# Supplementary material for: Development of coumarin-inspired bifunctional hybrids as a new class of anti-Alzheimer's agents with potent in vivo efficacy
Source: Royal Society of Chemistry journal article supplement (doi:10.1039/d4md00782d), 2024-12-11

**Development of coumarin-inspired bifunctional hybrids as a new class of anti-Alzheimer's agents with potent *in vivo* efficacy**

Atamjit Singh<sup>1,\*</sup>, Aman Sharma<sup>1</sup>, Karanvir Singh<sup>1</sup>, Kirandeep Kaur<sup>1</sup>, Pallvi Mohana<sup>2</sup>, Jignesh Prajapati<sup>3</sup>, Uttam Kaur<sup>4</sup>, Dweipayan Goswami<sup>3</sup>, Saroj Arora<sup>2</sup>, Renu Chadha<sup>5</sup>, Preet Mohinder Singh Bedi<sup>1,6\*</sup>

<sup>1</sup>*Department of Pharmaceutical Sciences, Guru Nanak Dev University, Amritsar, Punjab 143005, India*

<sup>2</sup>*Department of Botanical and Environmental Sciences, Guru Nanak Dev University, Amritsar, Punjab 143005, India*

<sup>3</sup>*Department of Microbiology & Biotechnology, University School of Sciences, Gujrat University, Ahmedabad, Gujrat 380009, India*

<sup>4</sup>*University School of Business Management, Chandigarh University, Gharuan 140413, India*

<sup>5</sup>*University Institute of Pharmaceutical Sciences, Punjab University, Chandigarh 160014, India*

<sup>6</sup>*Drug and Pollution testing Laboratory, Guru Nanak Dev University, Amritsar, Punjab 143005, India*

\*Corresponding authors:

1. Dr. Atamjit Singh

Department of Pharmaceutical Sciences, Guru Nanak Dev University, Amritsar, Punjab 143005, India

Email id: [atampanesar@gmail.com](mailto:atampanesar@gmail.com), [atamjitpharma.rsh@gndu.ac.in](mailto:atamjitpharma.rsh@gndu.ac.in)

ORCID: 0000-0001-5439-8032

2. Prof. Preet Mohinder Singh Bedi

Department of Pharmaceutical Sciences, Guru Nanak Dev University, Amritsar, Punjab 143005, India

Email id: [bedi\\_preet@yahoo.com](mailto:bedi_preet@yahoo.com), [preet.pharma@gndu.ac.in](mailto:preet.pharma@gndu.ac.in)

# $^1\text{H}$ and $^{13}\text{C}$ spectra of synthetics

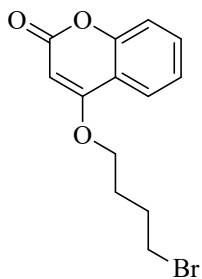

## $^1\text{H}$ spectrum of 4-(4-bromobutoxy)-2H-chromen-2-one

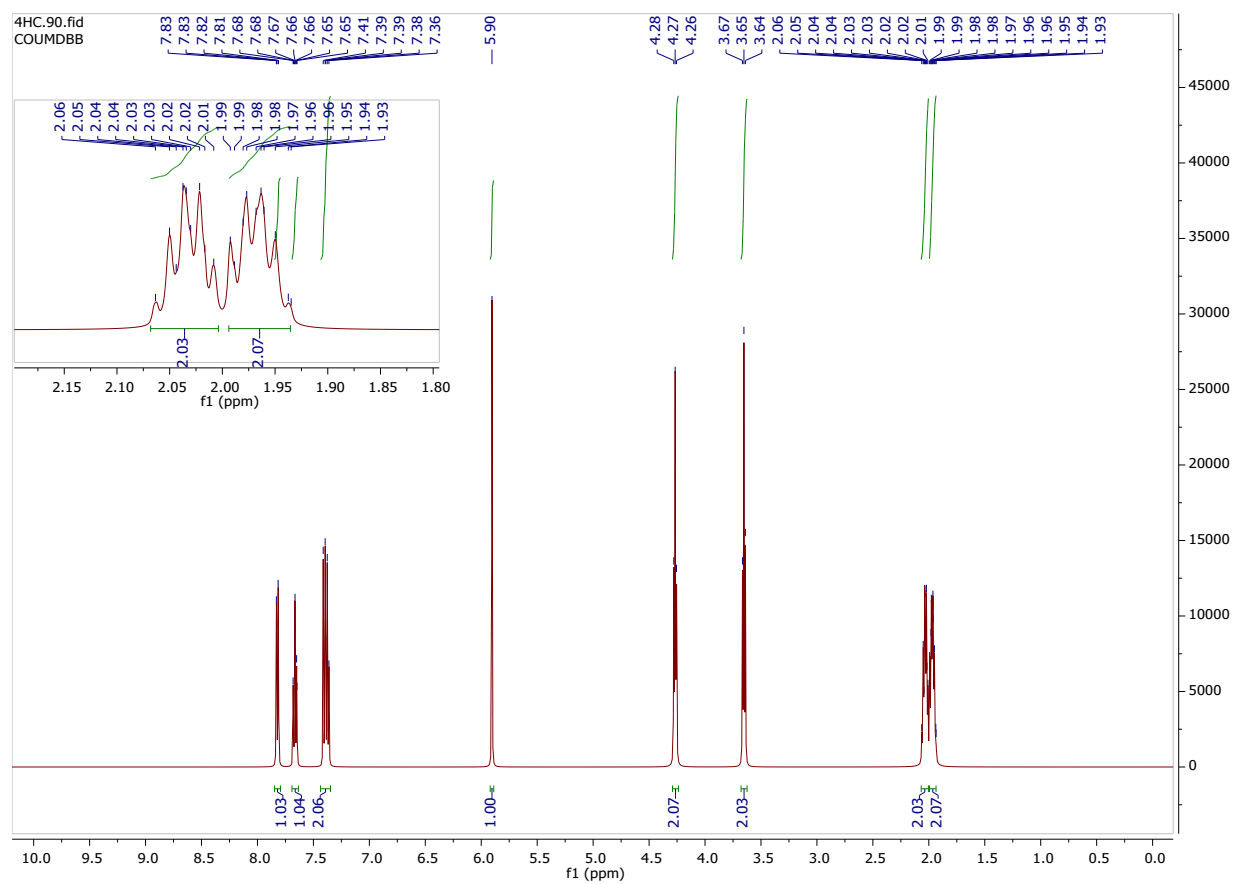

# $^{13}\text{C}$ spectrum of 4-(4-bromobutoxy)-2H-chromen-2-one

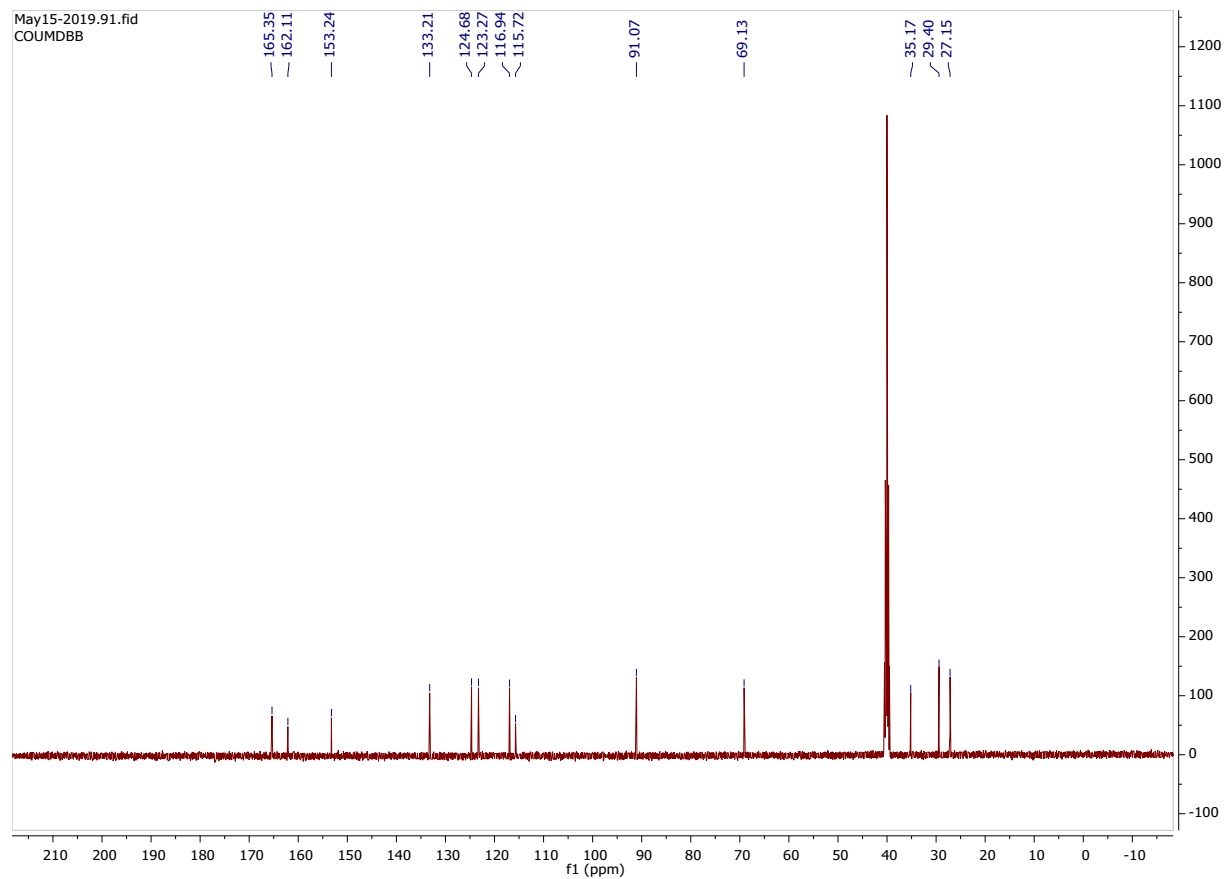

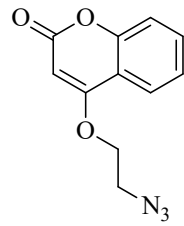

$^1\text{H}$  spectrum of 4-(2-azidoethoxy)-2H-chromen-2-one

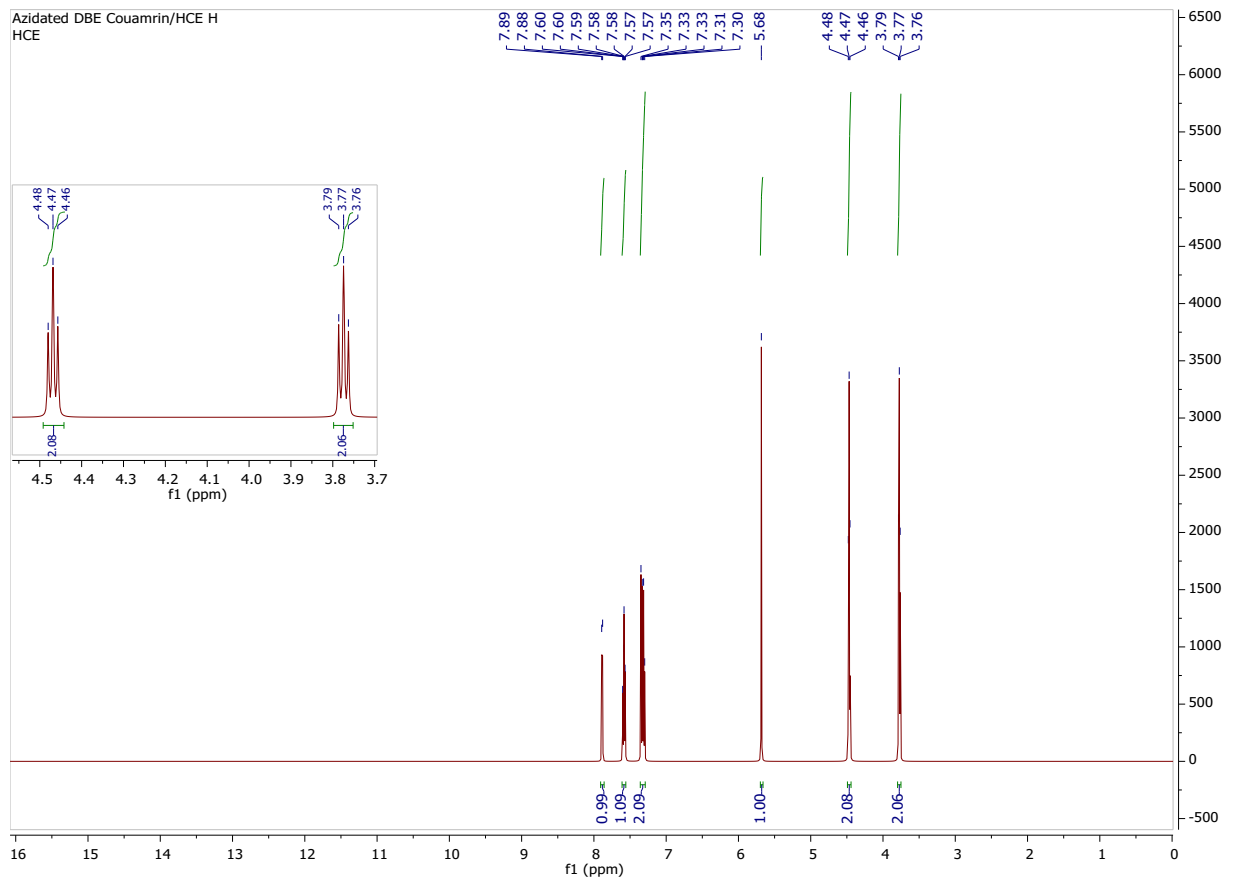

# <sup>13</sup>C spectrum of 4-(2-azidoethoxy)-2H-chromen-2-one

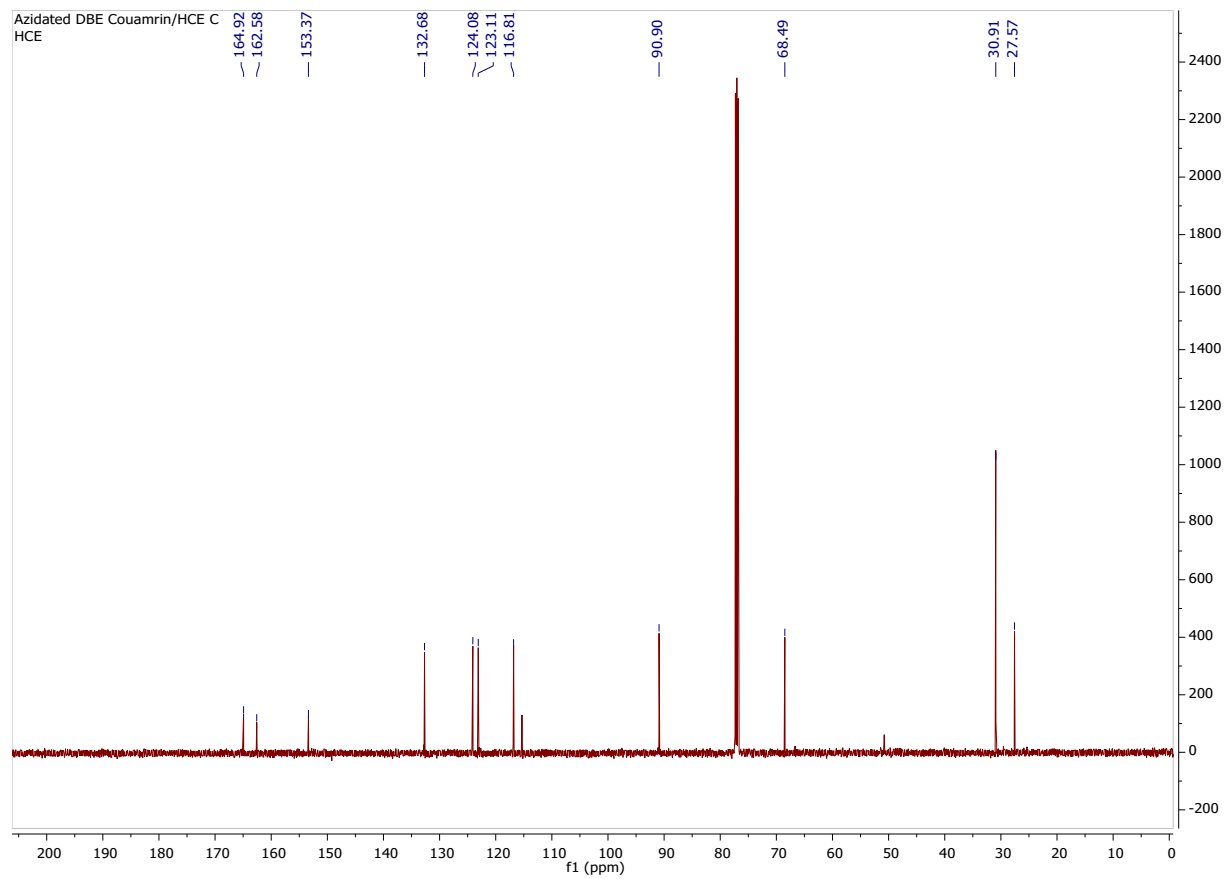

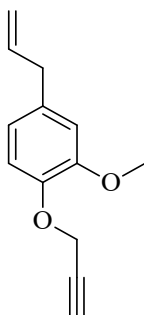

$^1\text{H}$  spectrum of 4-allyl-2-methoxy-1-(prop-2-yn-1-yloxy)benzene

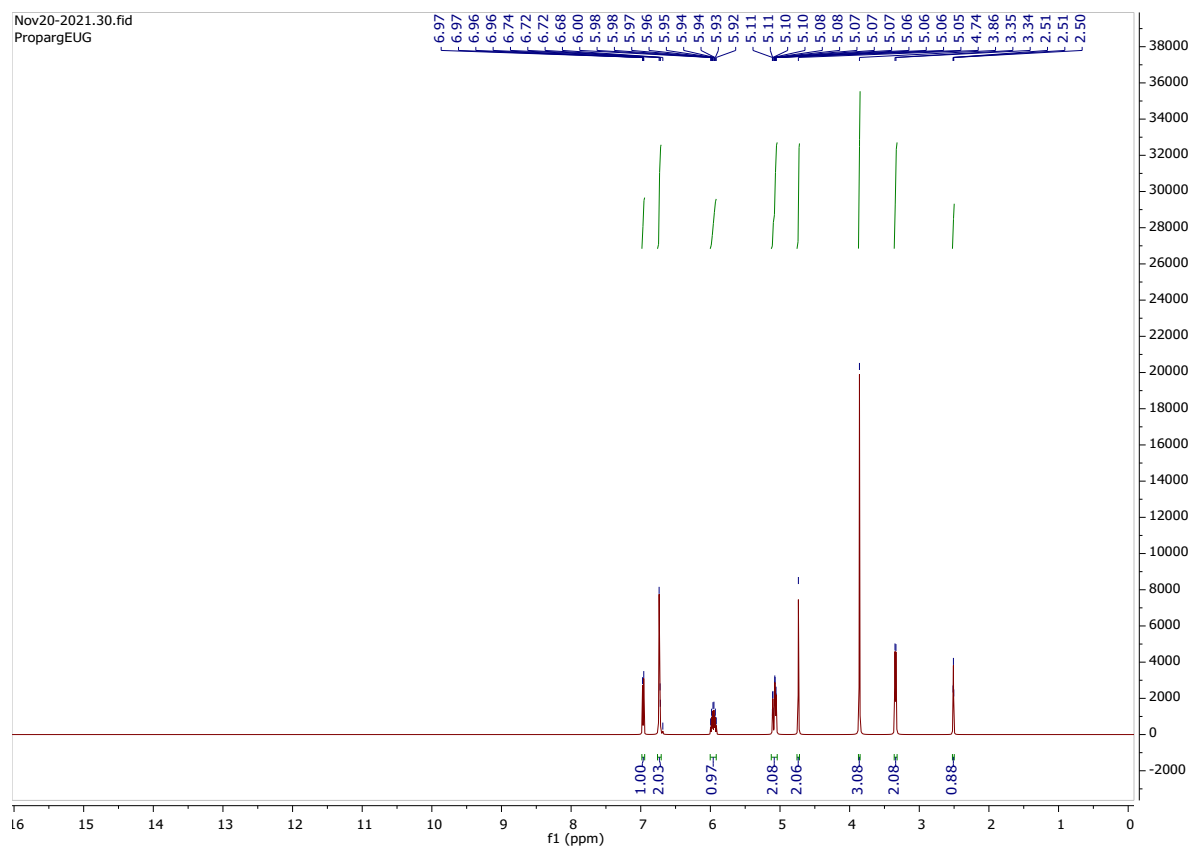

# $^{13}\text{C}$ spectrum of 4-allyl-2-methoxy-1-(prop-2-yn-1-yloxy)benzene

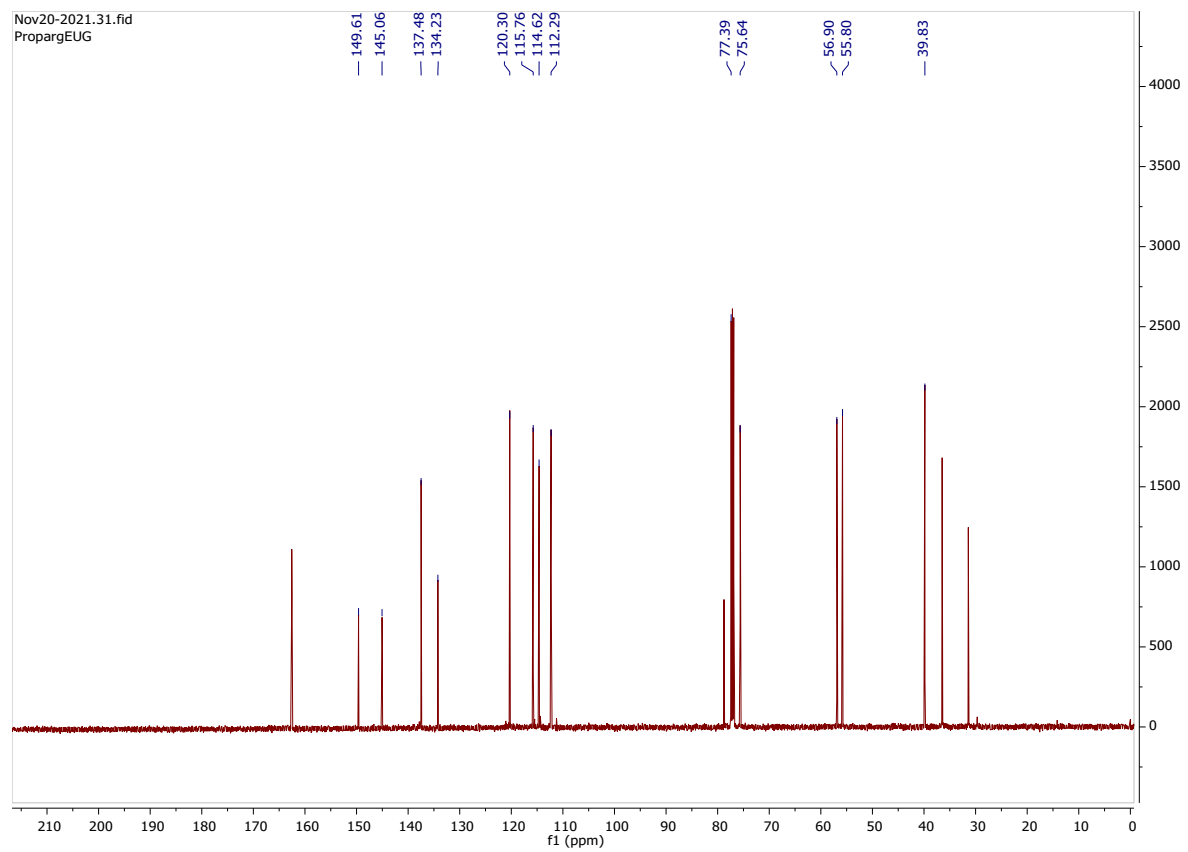

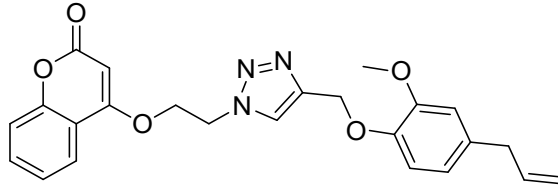

$^1\text{H}$  spectrum of 4-(2-(4-((4-allyl-2-methoxyphenoxy)methyl)-1H-1,2,3-triazol-1-yl)ethoxy)-2H-chromen-2-one (A1)

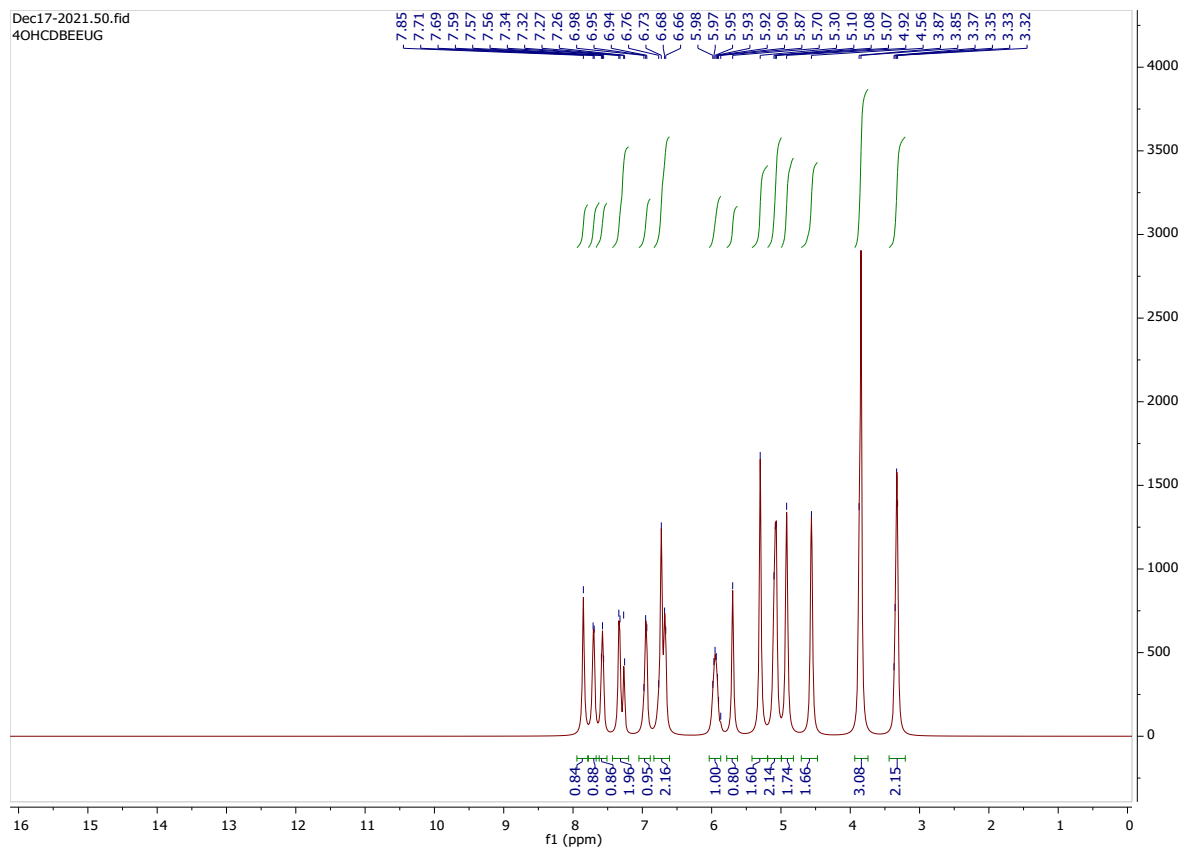



<sup>13</sup>C spectrum of 4-(2-(4-((4-allyl-2-methoxyphenoxy)methyl)-1H-1,2,3-triazol-1-yl)ethoxy)-2H-chromen-2-one (A1)

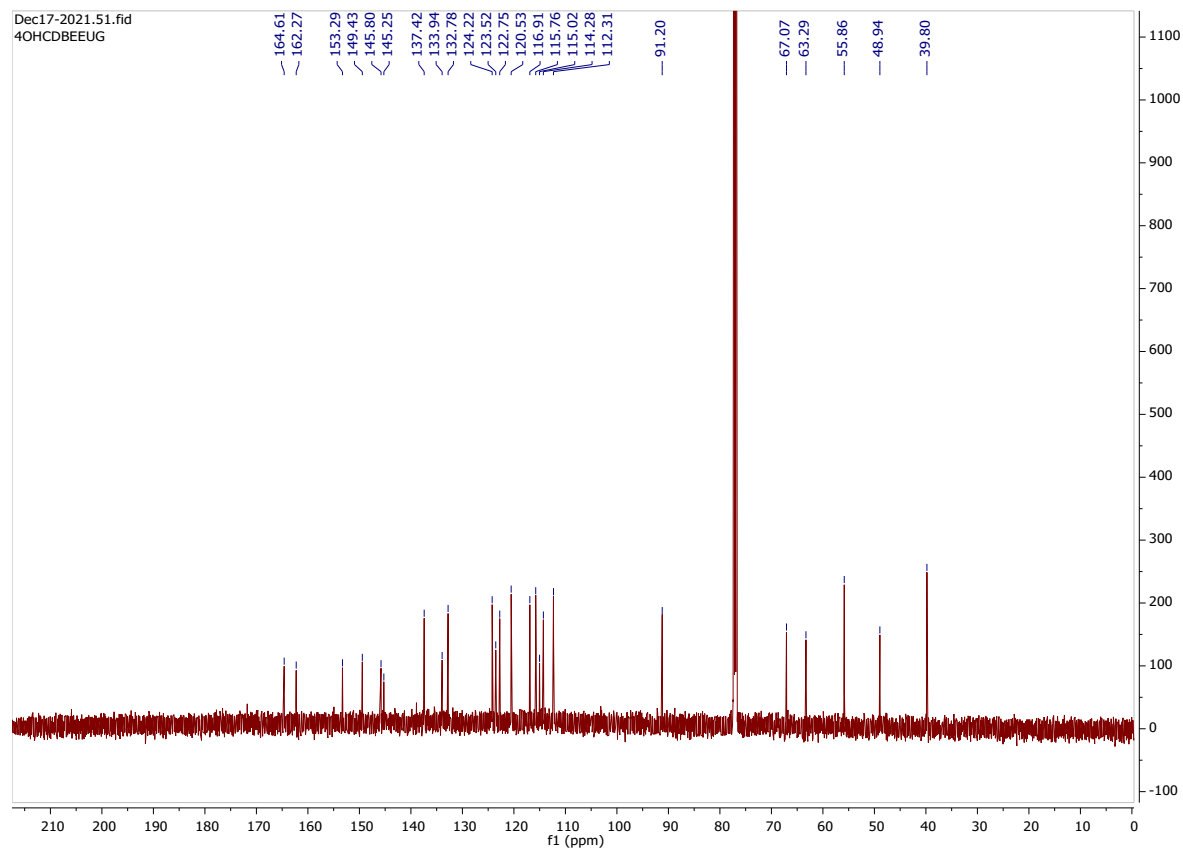

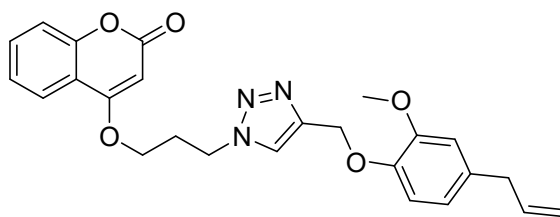

$^1\text{H}$  spectrum of 4-(3-(4-((4-allyl-2-methoxyphenoxy)methyl)-1H-1,2,3-triazol-1-yl)propoxy)-2H-chromen-2-one (**A2**)

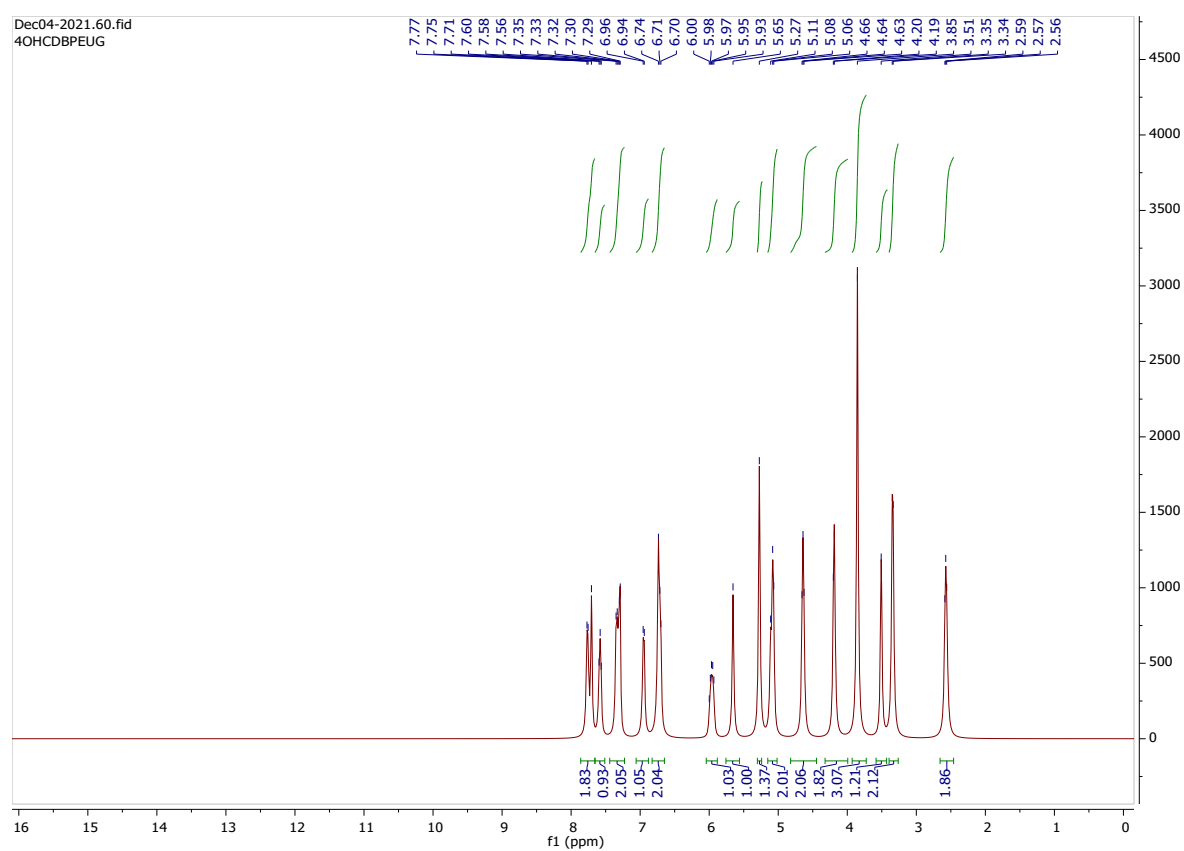

<sup>13</sup>C spectrum of 4-(3-(4-((4-allyl-2-methoxyphenoxy)methyl)-1H-1,2,3-triazol-1-yl)propoxy)-2H-chromen-2-one (A2)

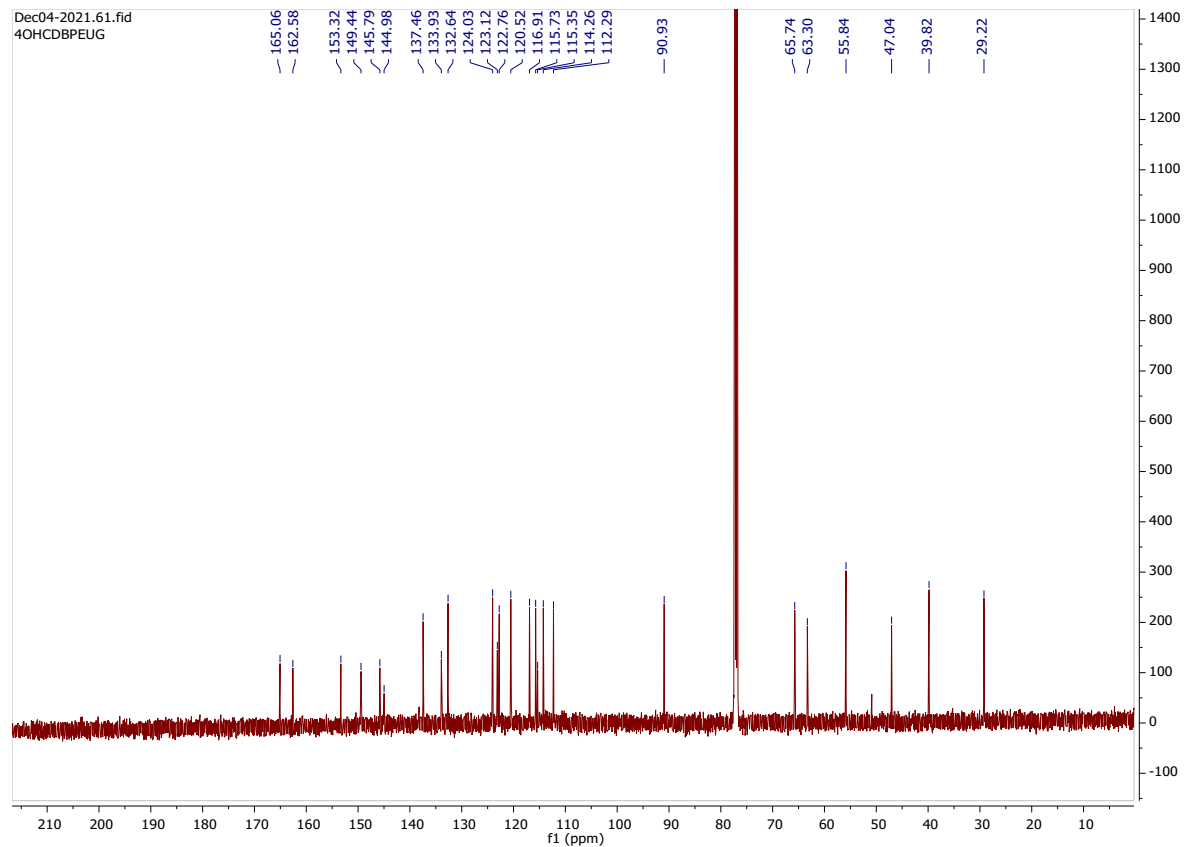

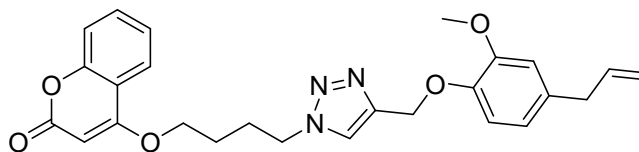

$^1\text{H}$  spectrum of 4-(4-(4-((4-allyl-2-methoxyphenoxy)methyl)-1H-1,2,3-triazol-1-yl)butoxy)-2H-chromen-2-one (**A3**)

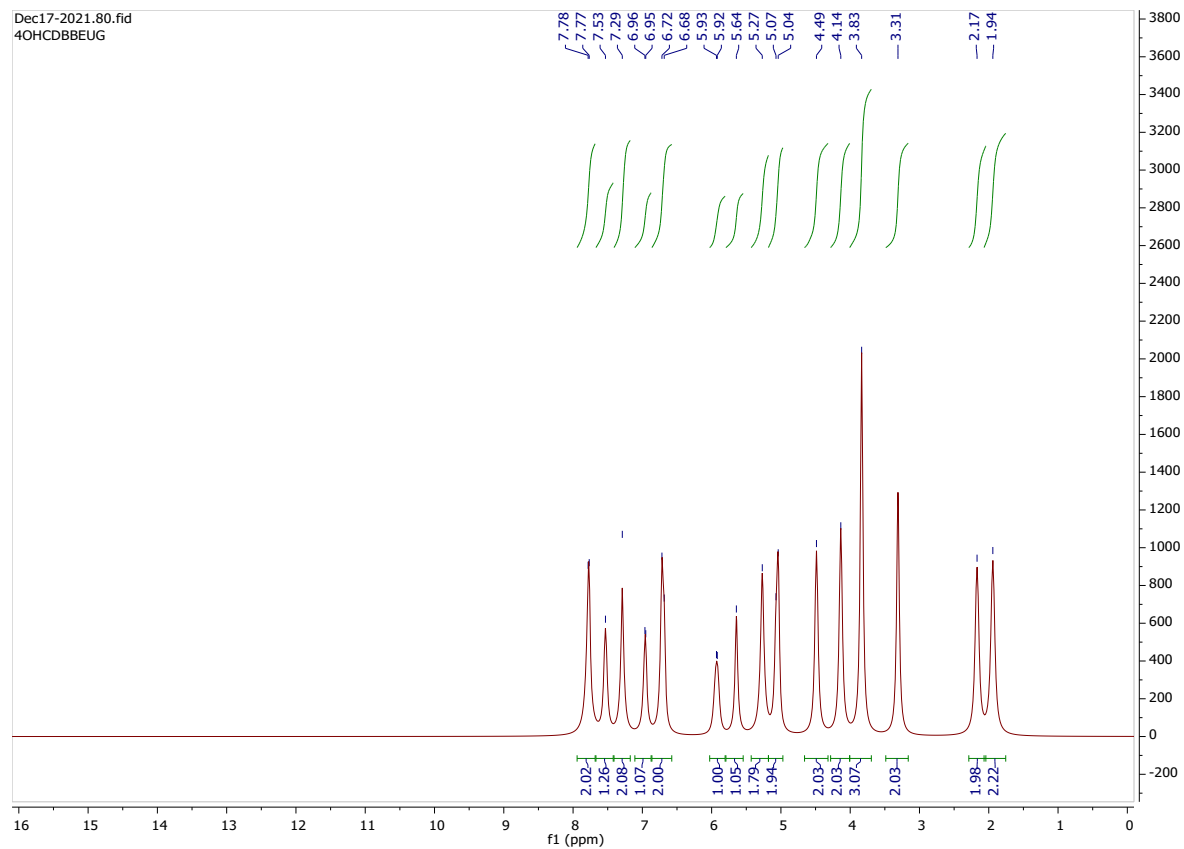

<sup>13</sup>C spectrum of 4-(4-(4-((4-allyl-2-methoxyphenoxy)methyl)-1H-1,2,3-triazol-1-yl)butoxy)-2H-chromen-2-one (A3)

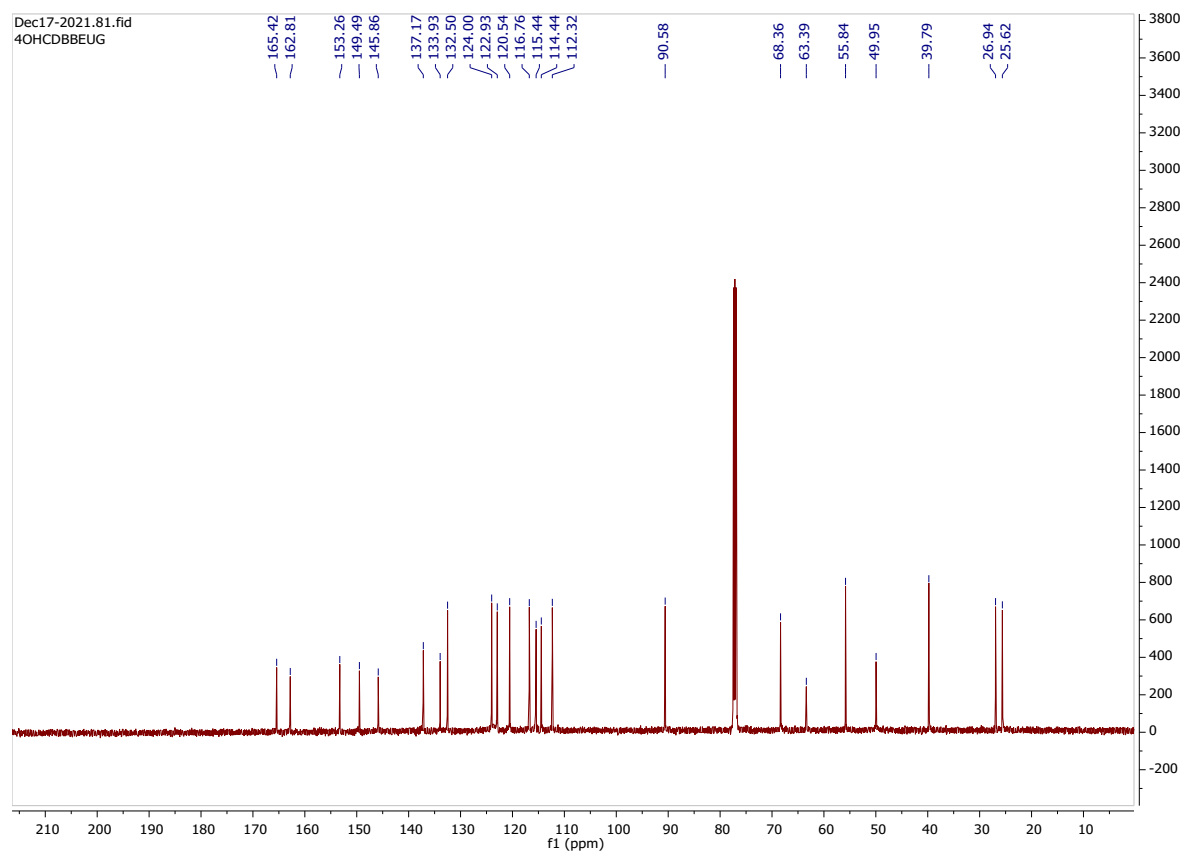

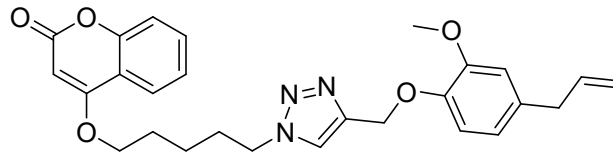

$^1\text{H}$  spectrum of 4-((5-(4-((4-allyl-2-methoxyphenoxy)methyl)-1H-1,2,3-triazol-1-yl)pentyl)oxy)-2H-chromen-2-one (A4)

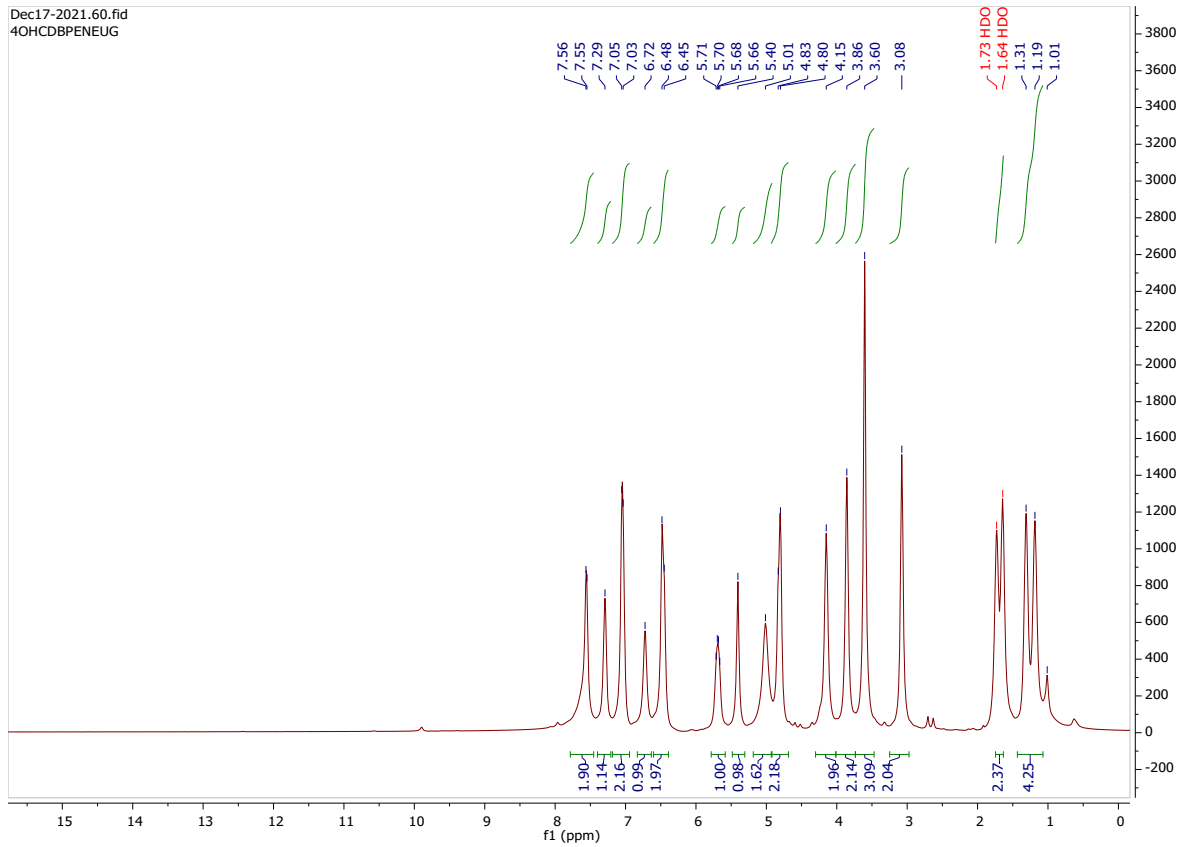

<sup>13</sup>C spectrum of 4-((5-(4-((4-allyl-2-methoxyphenoxy)methyl)-1H-1,2,3-triazol-1-yl)pentyl)oxy)-2H-chromen-2-one (A4)

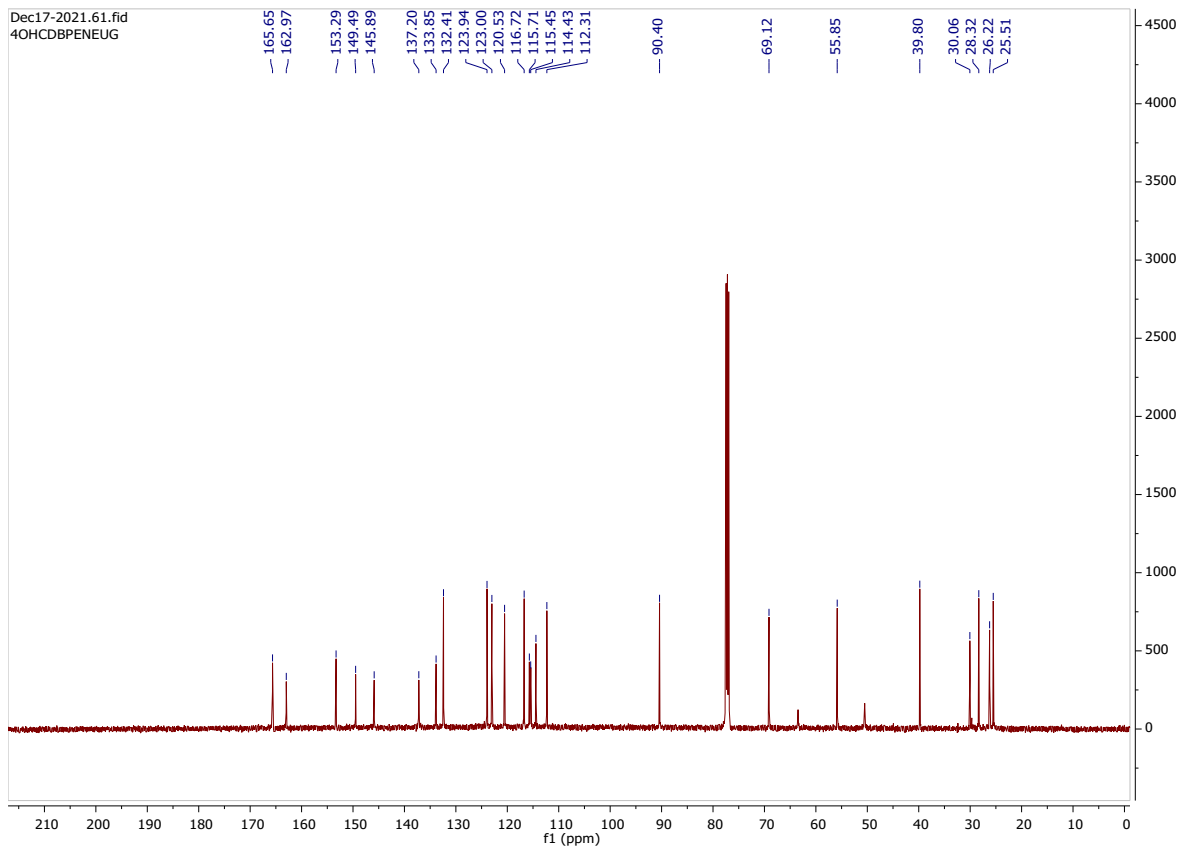

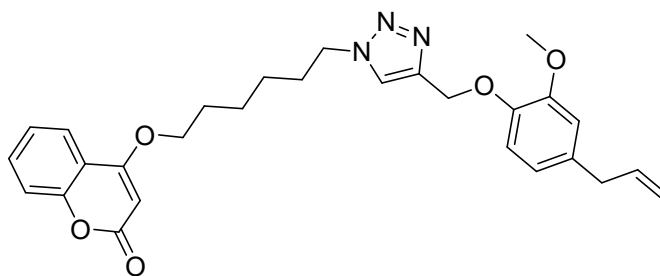

$^1\text{H}$  spectrum of 4-((5-(4-allyl-2-methoxyphenoxy)methyl)-1H-1,2,3-triazol-1-yl)pentyl)-2H-chromen-2-one (A5)

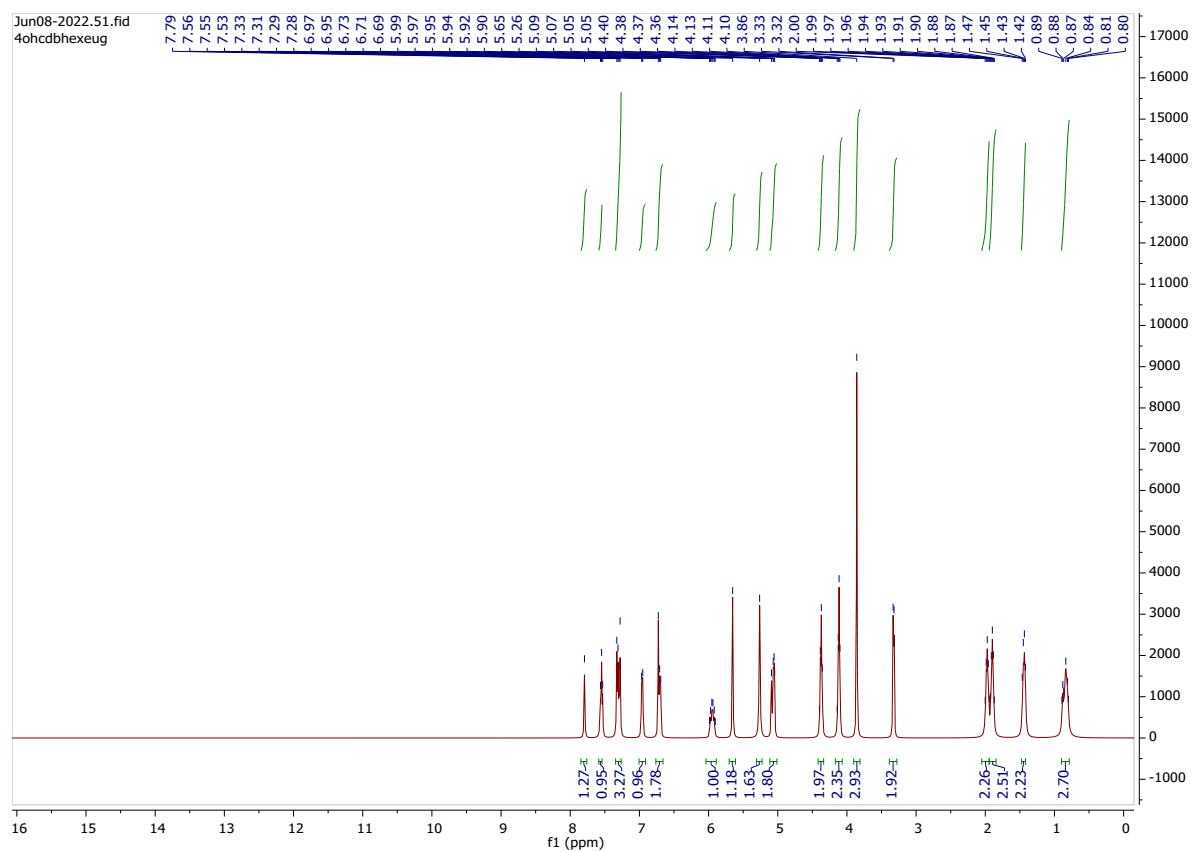



<sup>13</sup>C spectrum of 4-((5-(4-((4-allyl-2-methoxyphenoxy)methyl)-1H-1,2,3-triazol-1-yl)pentyl)oxy)-2H-chromen-2-one (A5)

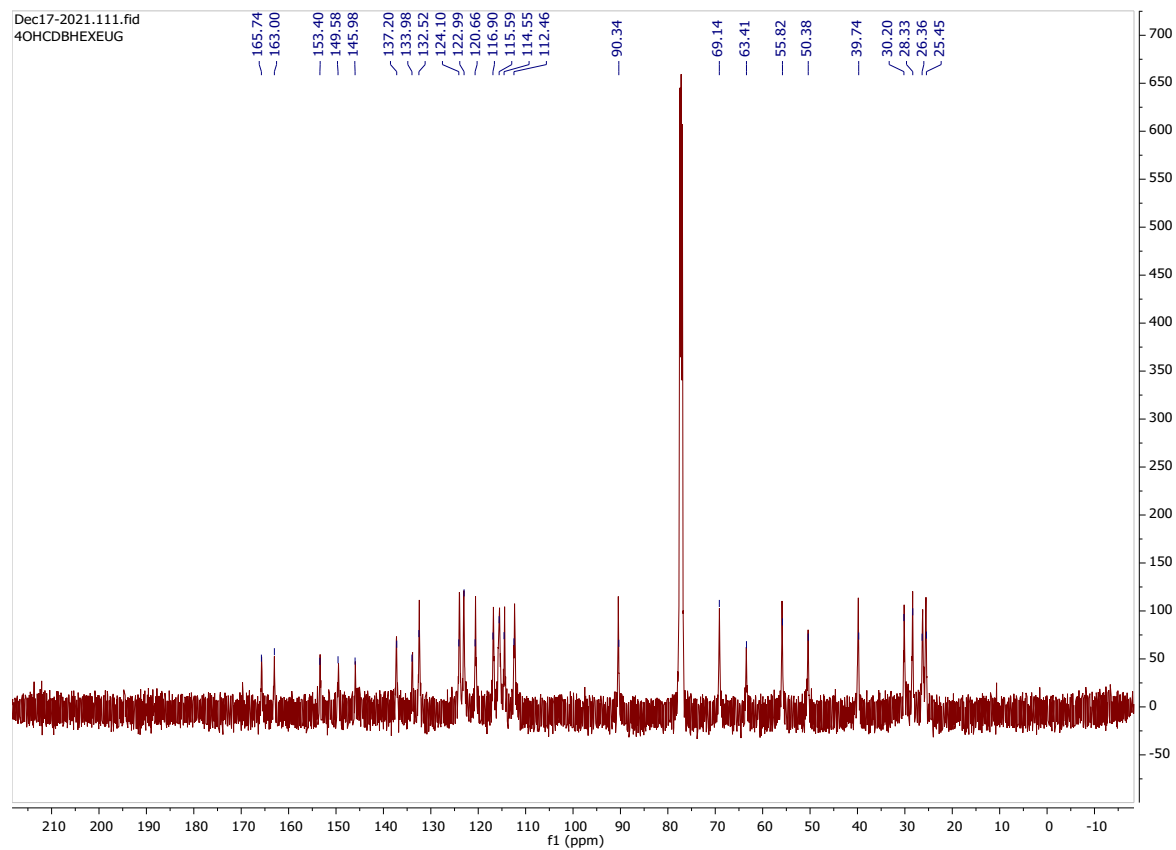

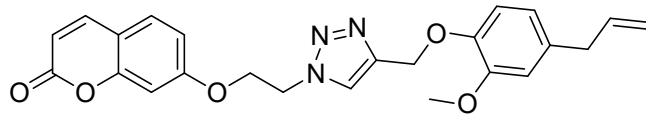

$^1\text{H}$  spectrum of 7-(2-(4-((4-allyl-2-methoxyphenoxy)methyl)-1H-1,2,3-triazol-1-yl)ethoxy)-2H-chromen-2-one (A6)

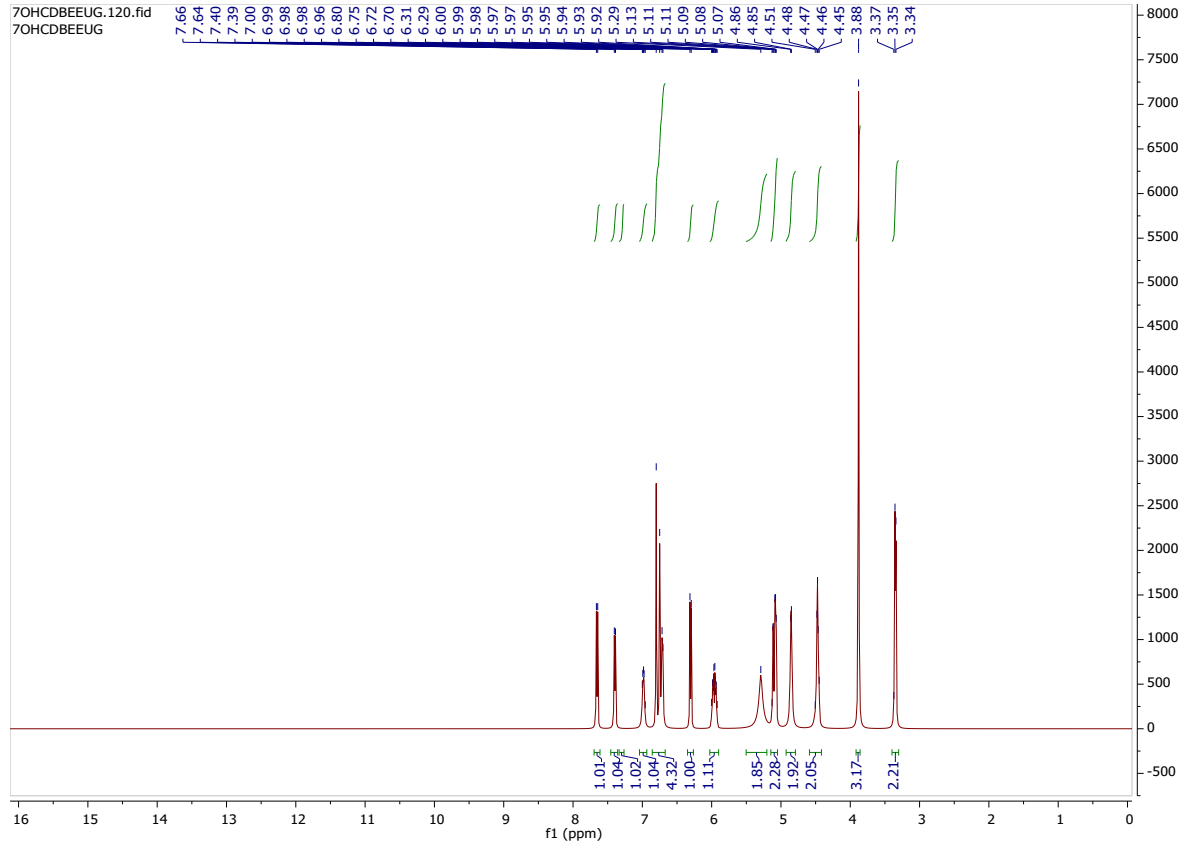

<sup>13</sup>C spectrum of 7-(2-(4-((4-allyl-2-methoxyphenoxy)methyl)-1H-1,2,3-triazol-1-yl)ethoxy)-2H-chromen-2-one (A6)

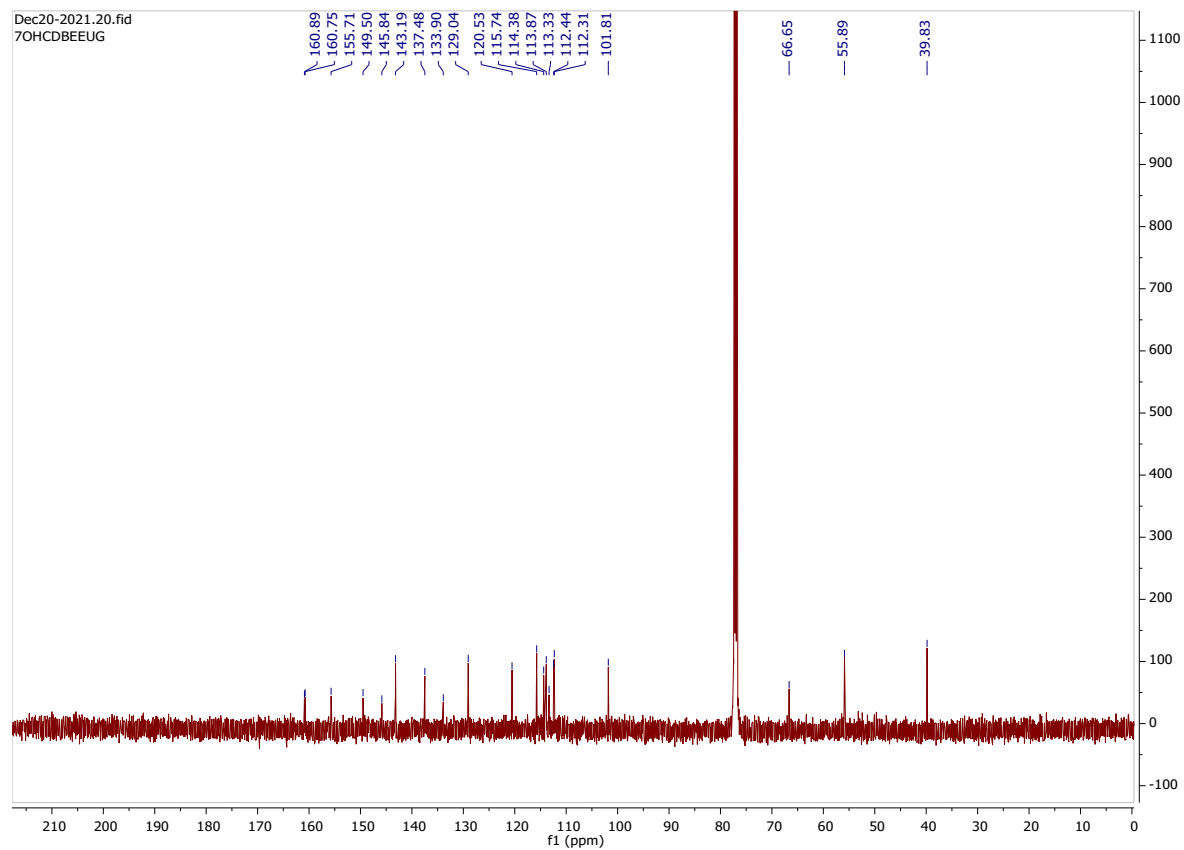

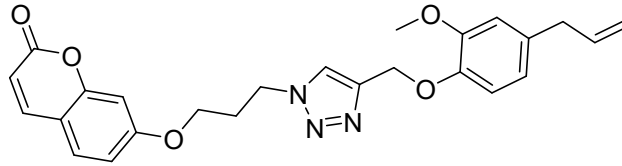

$^1\text{H}$  spectrum of 7-(3-(4-allyloxyphenyl)methyl)-1H-1,2,3-triazol-1-yl)propoxy)-2H-chromen-2-one (A7)

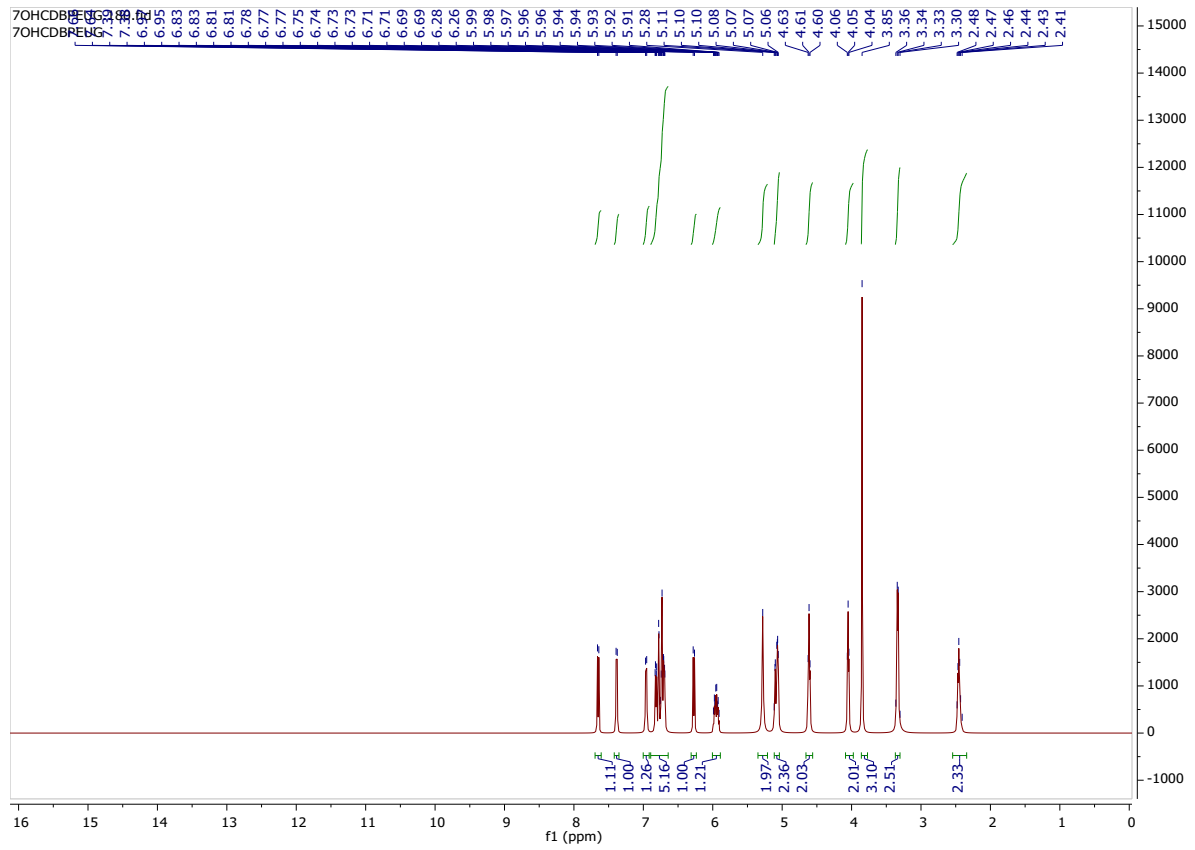

<sup>13</sup>C spectrum of 7-(3-(4-((4-allyl-2-methoxyphenoxy)methyl)-1H-1,2,3-triazol-1-yl)propoxy)-2H-chromen-2-one (A7)

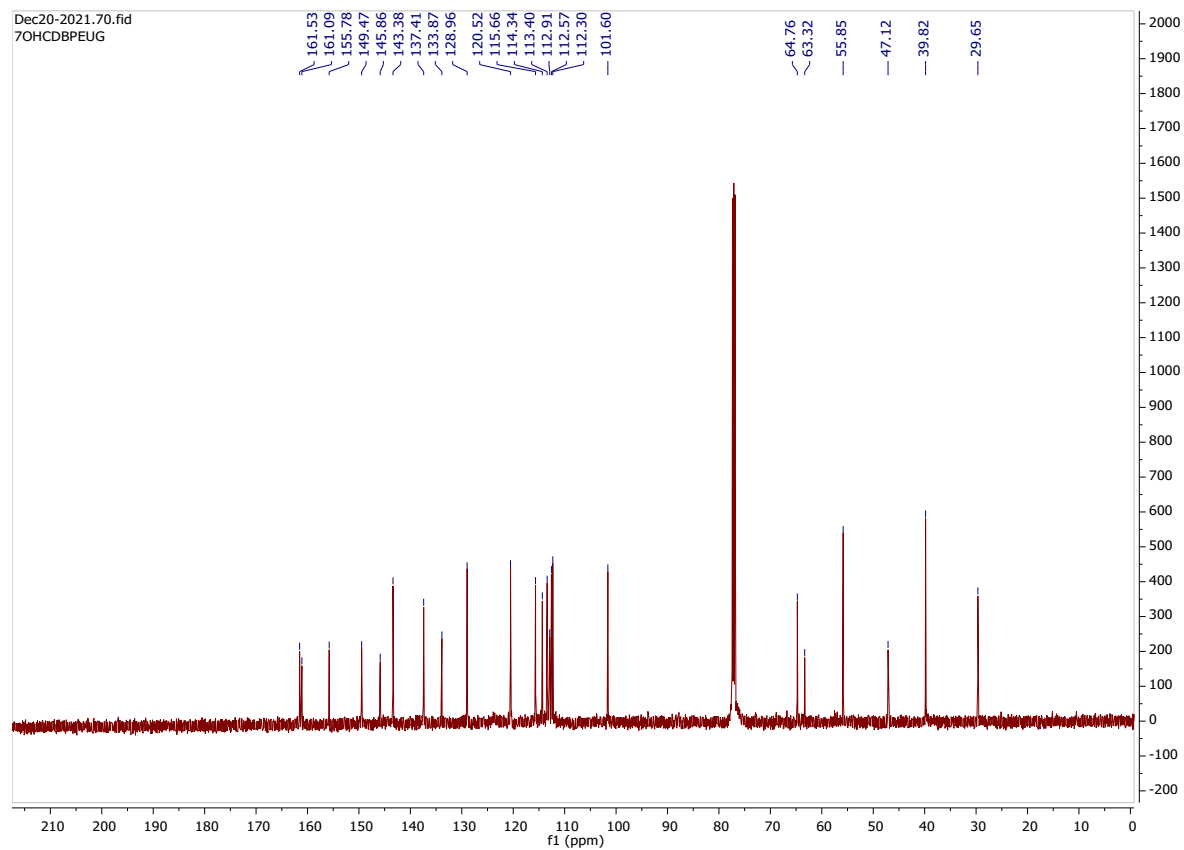

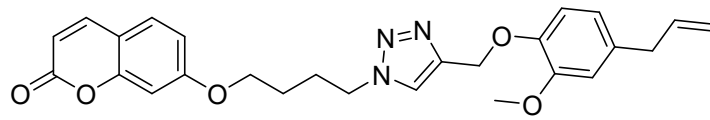

$^1\text{H}$  spectrum of 7-(4-(4-((4-allyl-2-methoxyphenoxy)methyl)-1H-1,2,3-triazol-1-yl)butoxy)-2H-chromen-2-one (A8)

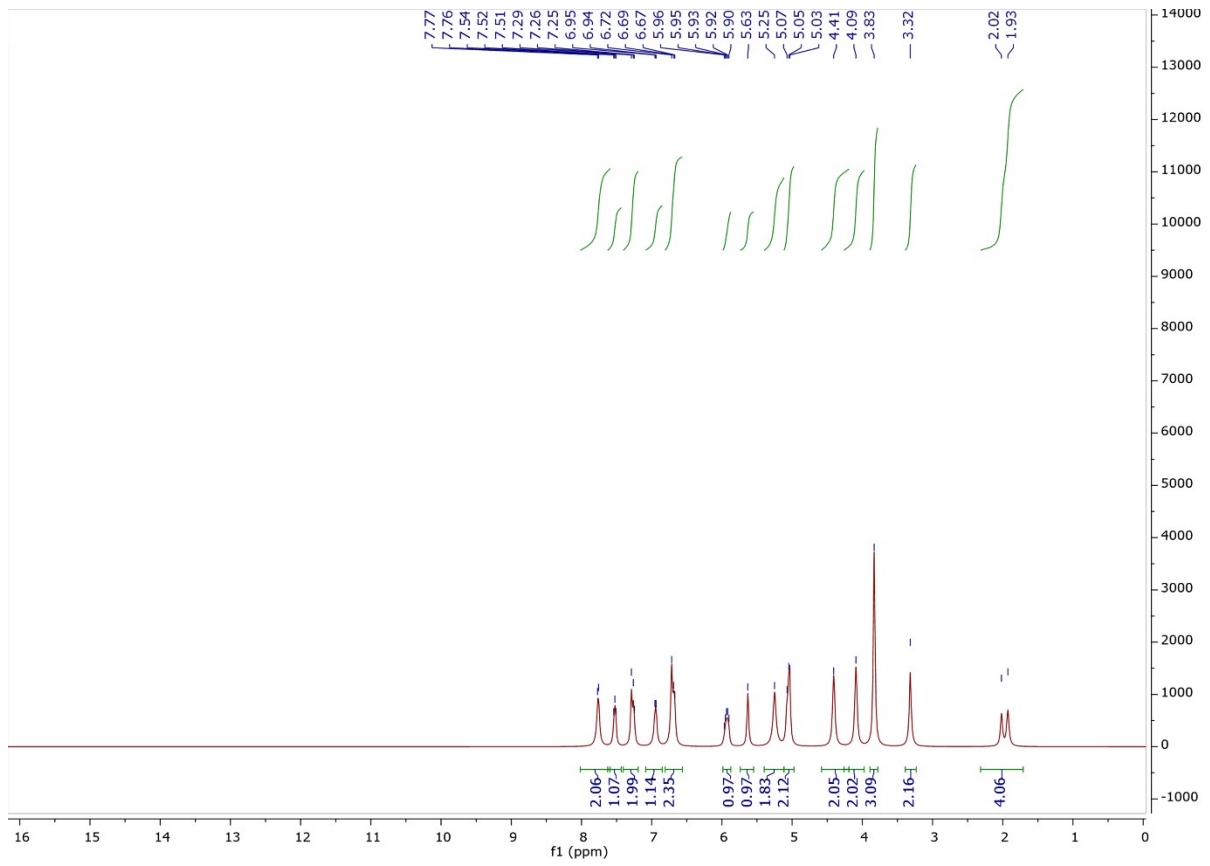

<sup>13</sup>C spectrum of 7-(4-(4-((4-allyl-2-methoxyphenoxy)methyl)-1H-1,2,3-triazol-1-yl)butoxy)-2H-chromen-2-one (A8)

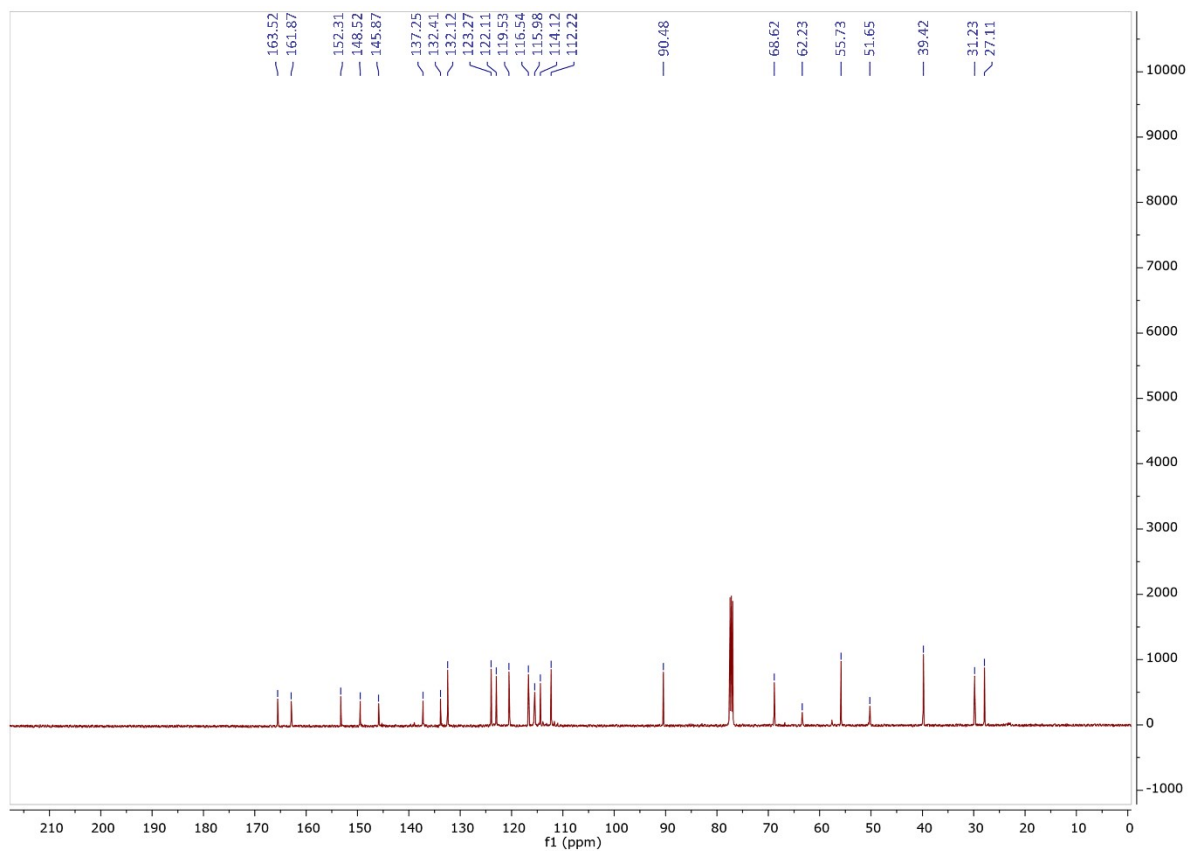

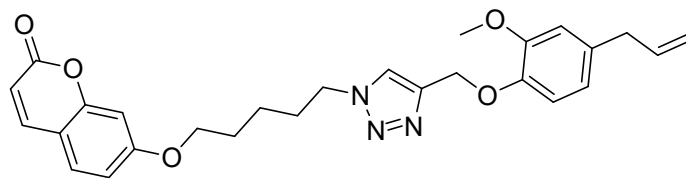

$^1\text{H}$  spectrum of 7-((5-(4-((4-allyl-2-methoxyphenoxy)methyl)-1H-1,2,3-triazol-1-yl)pentyl)oxy)-2H-chromen-2-one (A9)

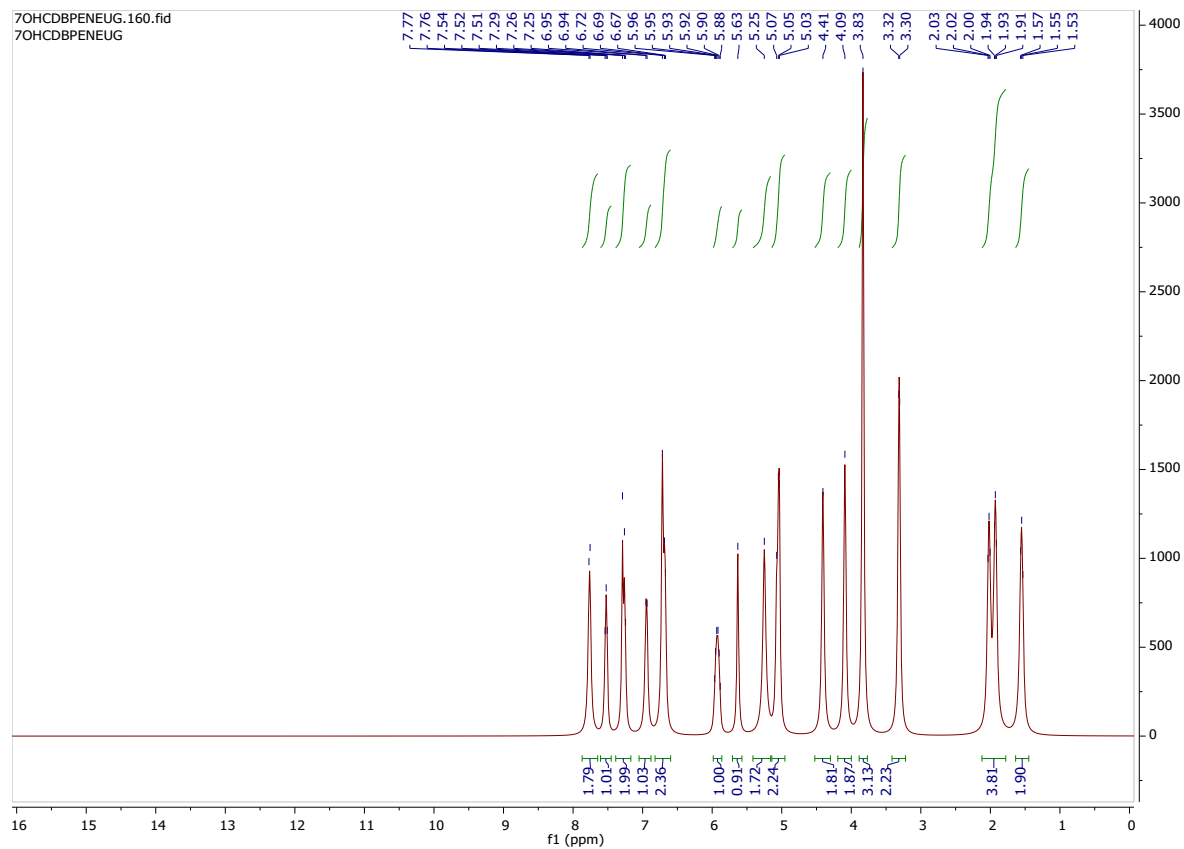



<sup>13</sup>C spectrum of 7-(4-(4-((4-allyl-2-methoxyphenoxy)methyl)-1H-1,2,3-triazol-1-yl)butoxy)-2H-chromen-2-one (A9)

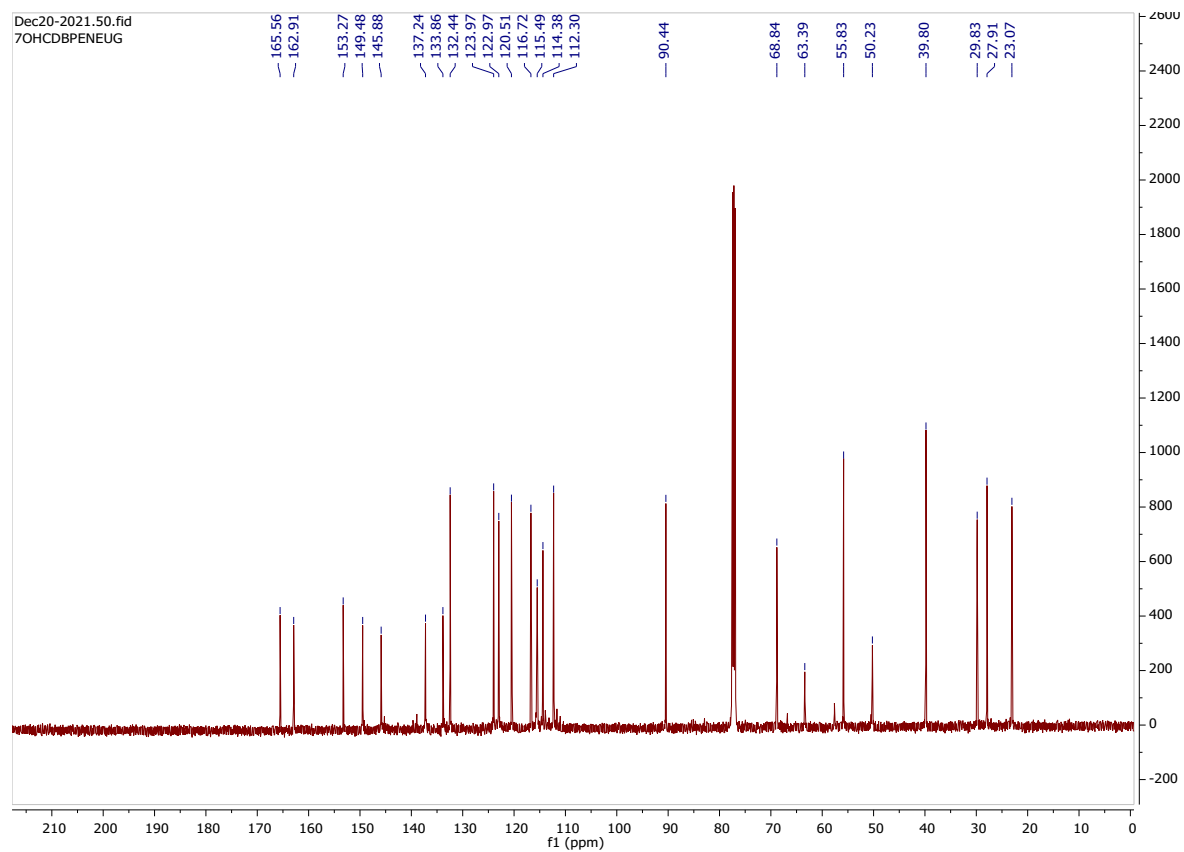

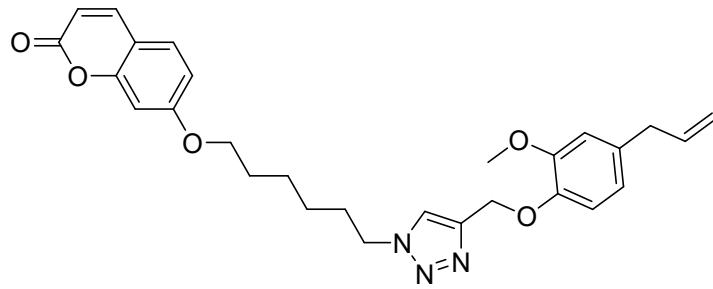

$^1\text{H}$  spectrum of 7-((6-(4-((4-allyl-2-methoxyphenoxy)methyl)-1H-1,2,3-triazol-1-yl)hexyl)oxy)-2H-chromen-2-one (**A10**)

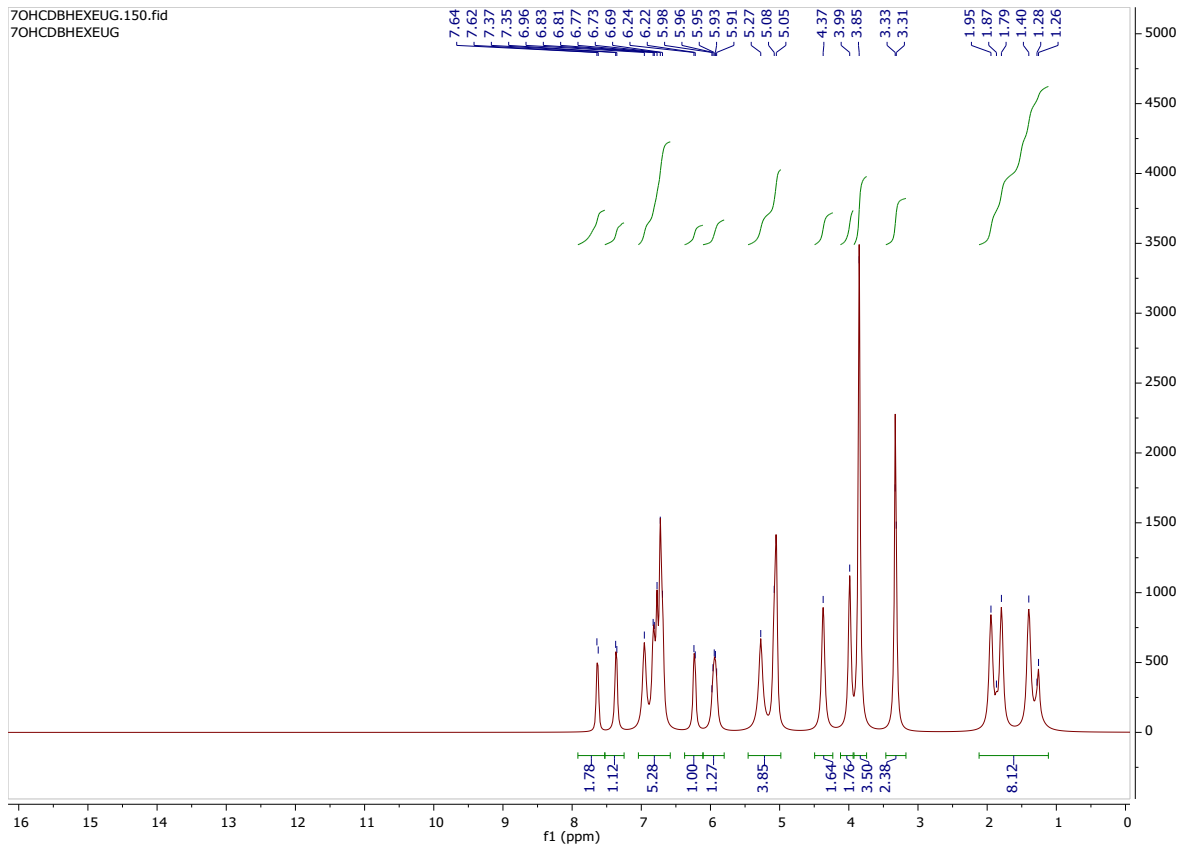

<sup>13</sup>C spectrum of 7-((6-(4-((4-allyl-2-methoxyphenoxy)methyl)-1H-1,2,3-triazol-1-yl)hexyl)oxy)-2H-chromen-2-one (A10)

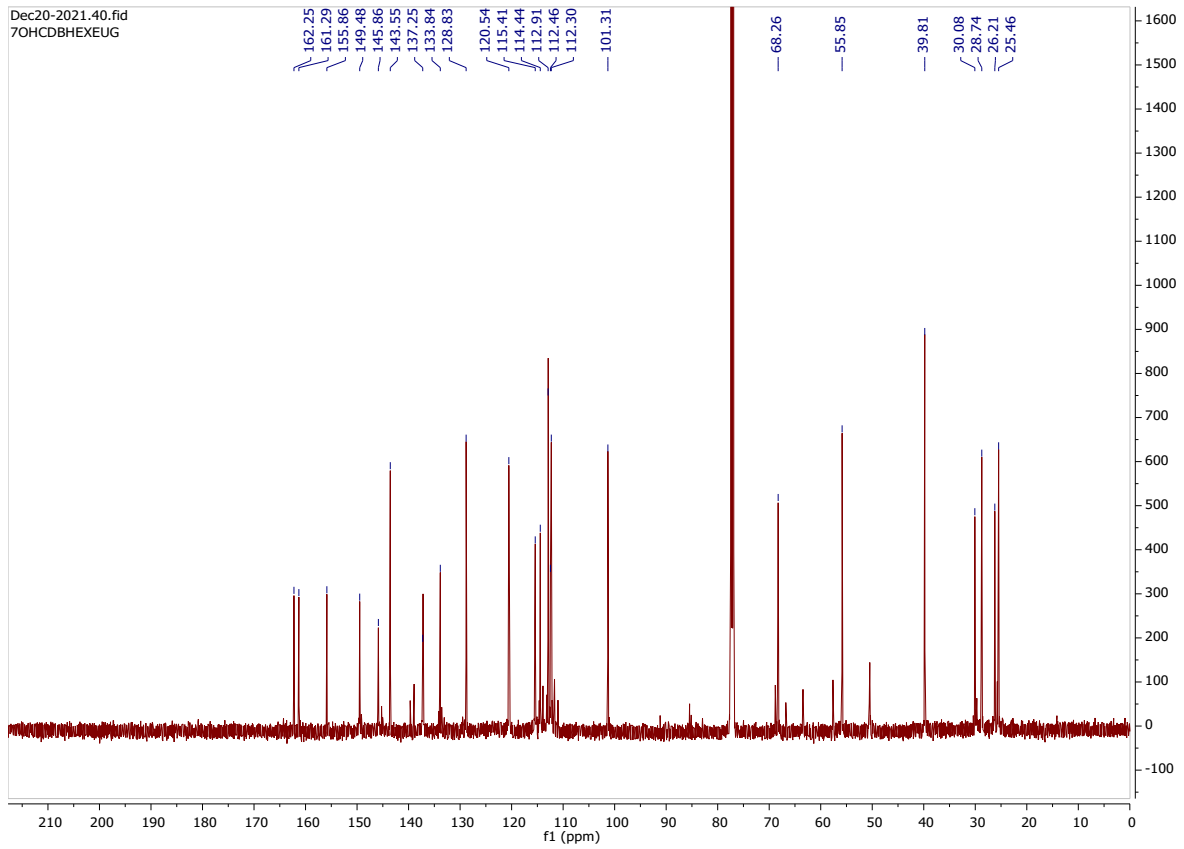

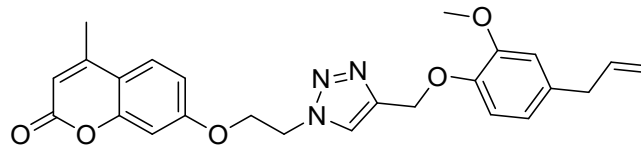

$^1\text{H}$  spectrum of 7-(2-(4-((4-allyl-2-methoxyphenoxy)methyl)-1H-1,2,3-triazol-1-yl)ethoxy)-4-methyl-2H-chromen-2-one (**A11**)

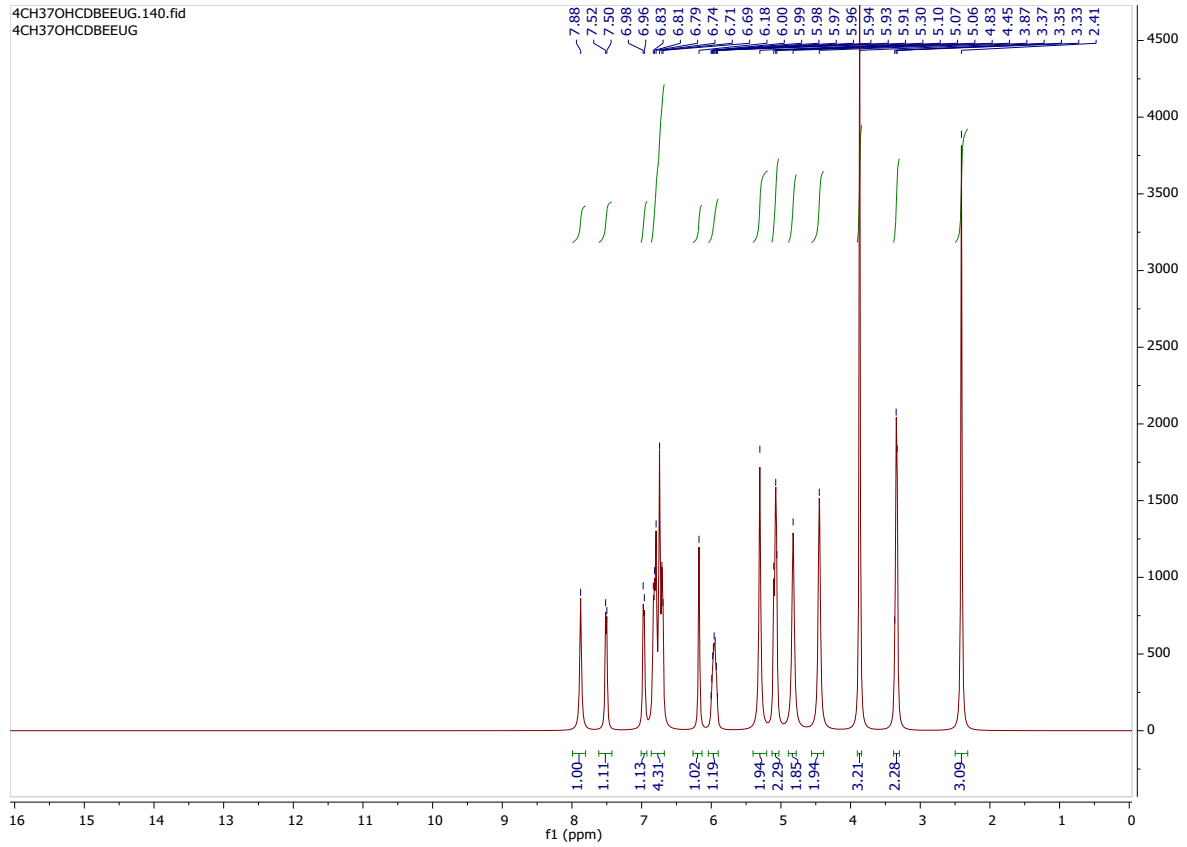

<sup>13</sup>C spectrum of 7-(2-(4-((4-allyl-2-methoxyphenoxy)methyl)-1H-1,2,3-triazol-1-yl)ethoxy)-4-methyl-2H-chromen-2-one (A11)

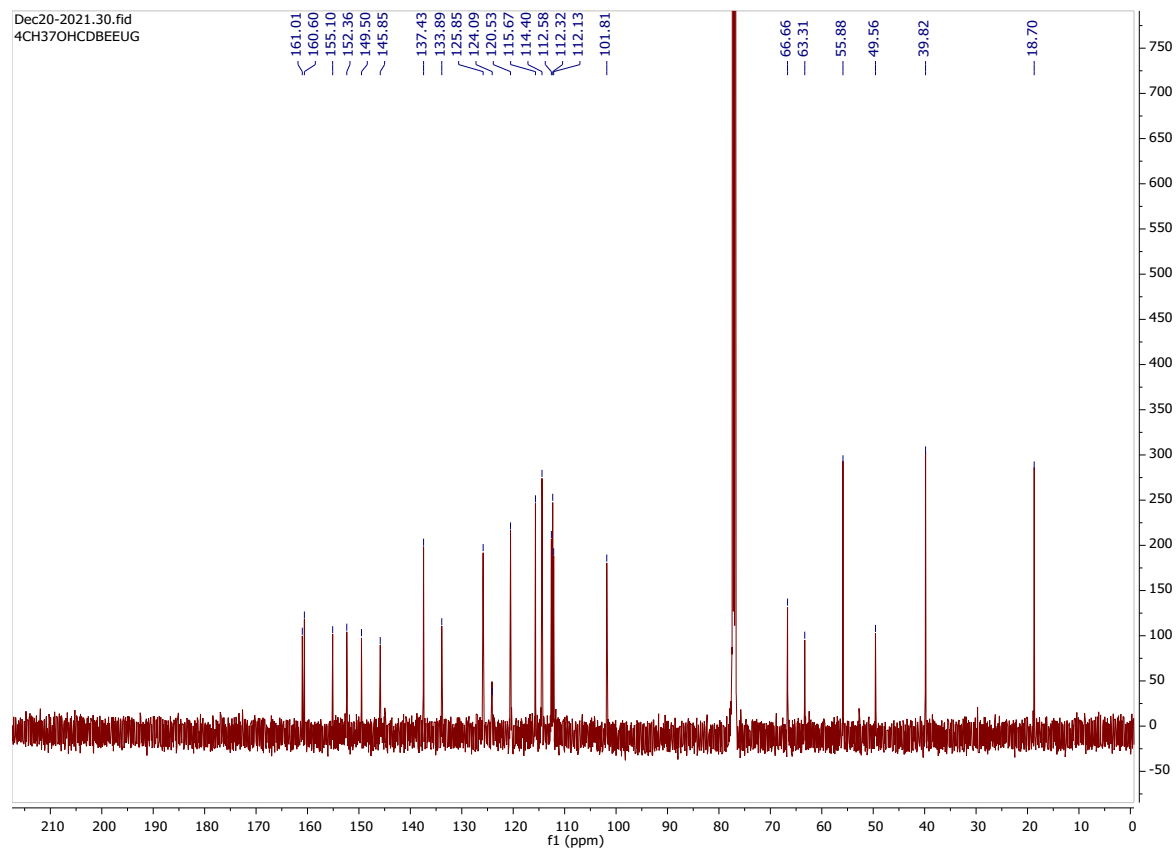

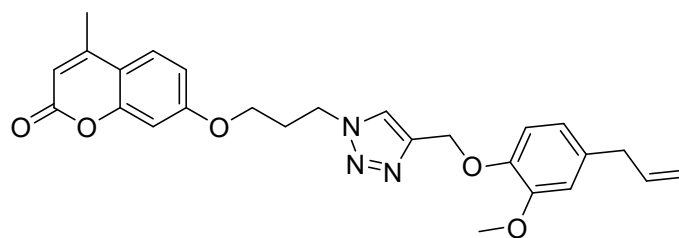

$^1\text{H}$  spectrum of 7-(3-(4-allyl-2-methoxyphenoxy)methyl)-1H-1,2,3-triazol-1-yl)propoxy)-4-methyl-2H-chromen-2-one (**A12**)

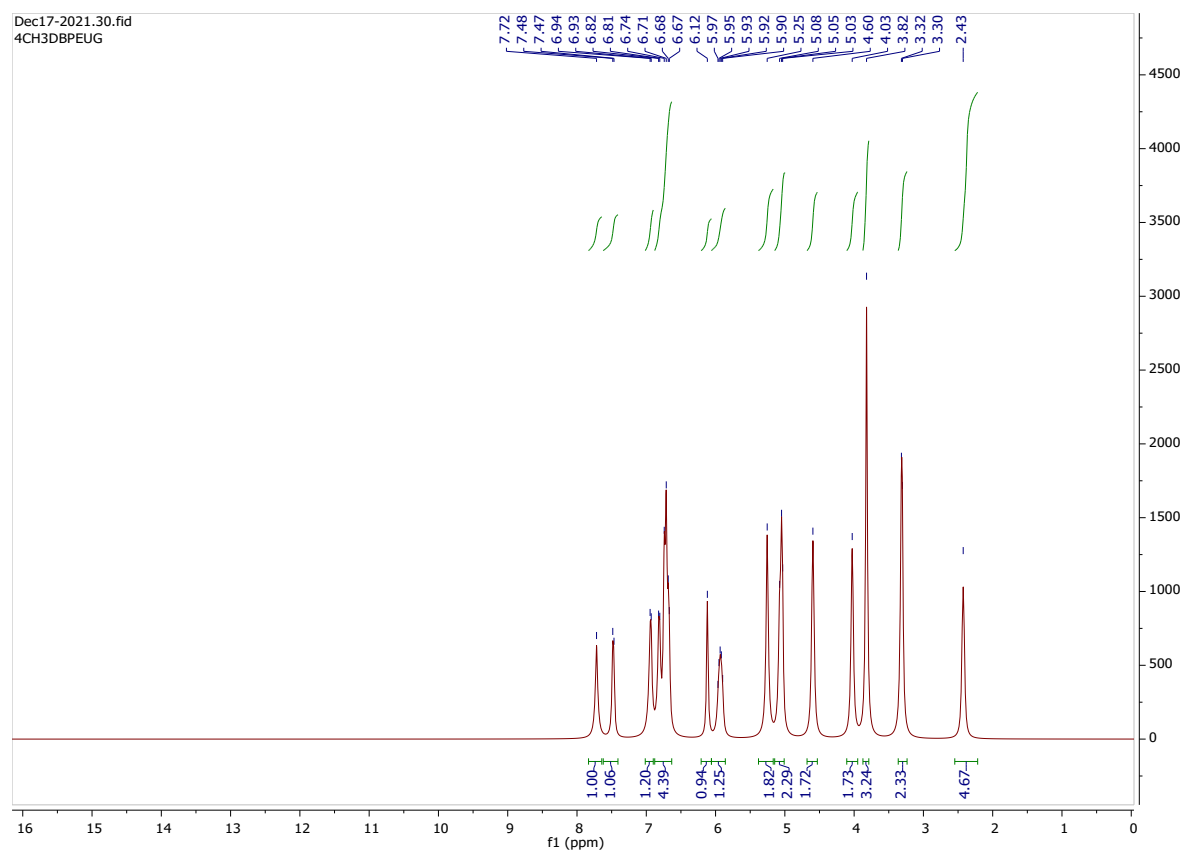

<sup>13</sup>C spectrum of 7-(3-(4-((4-allyl-2-methoxyphenoxy)methyl)-1H-1,2,3-triazol-1-yl)propoxy)-4-methyl-2H-chromen-2-one (A12)

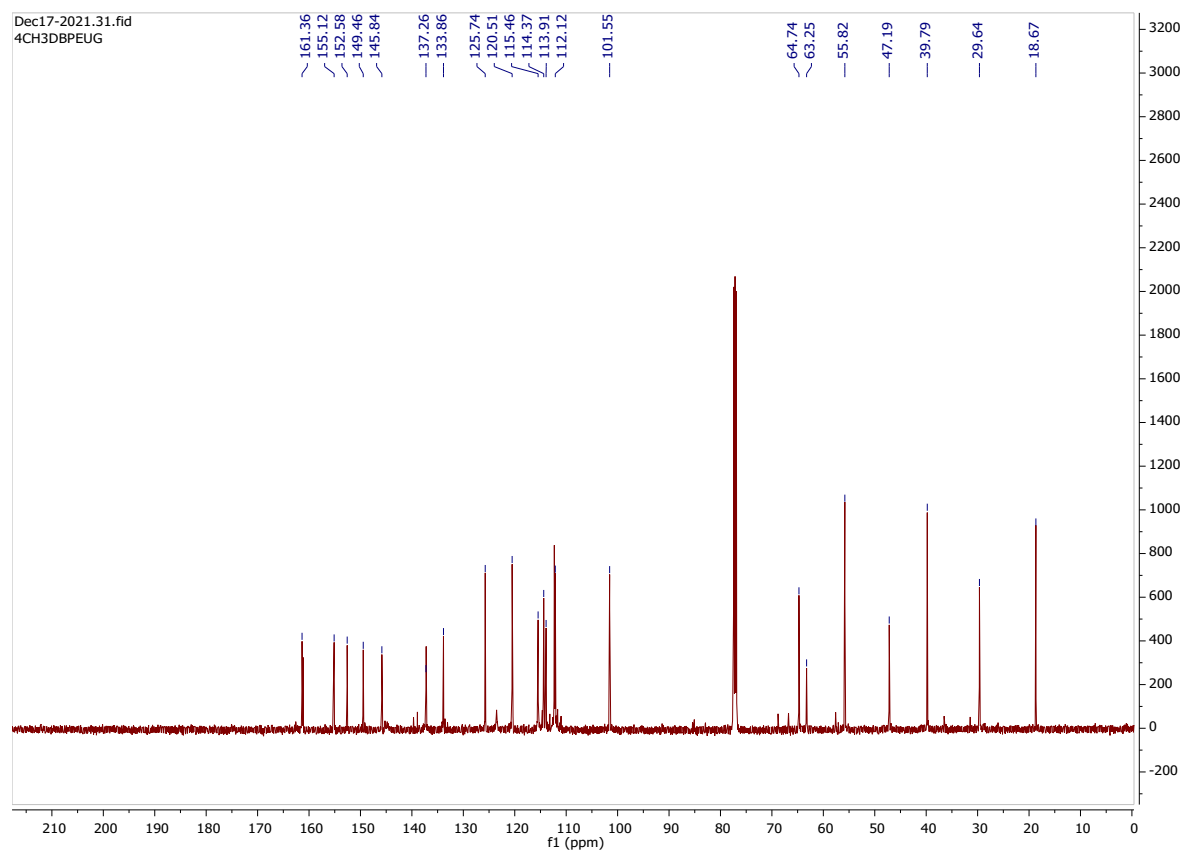

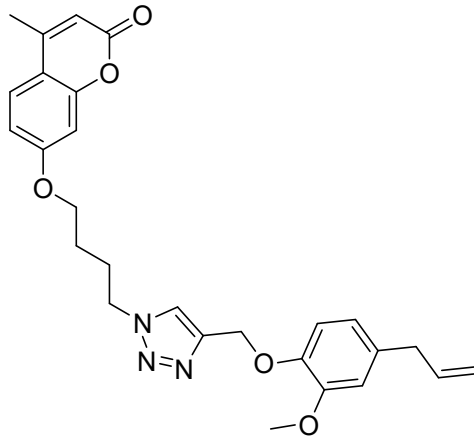

$^1\text{H}$  spectrum of 7-(4-(4-((4-allyl-2-methoxyphenoxy)methyl)-1H-1,2,3-triazol-1-yl)butoxy)-4-methyl-2H-chromen-2-one (A13)

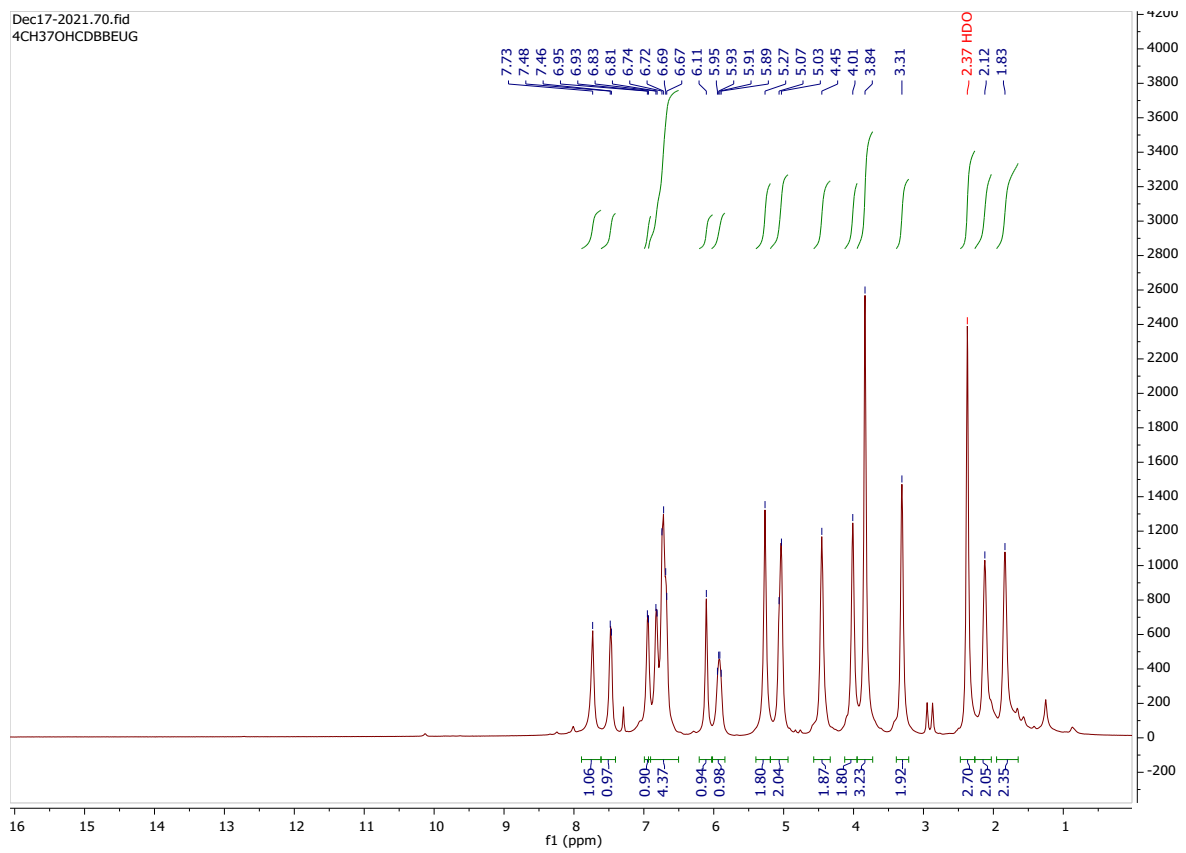



<sup>13</sup>C spectrum of 7-(4-(4-((4-allyl-2-methoxyphenoxy)methyl)-1H-1,2,3-triazol-1-yl)butoxy)-4-methyl-2H-chromen-2-one (A13)

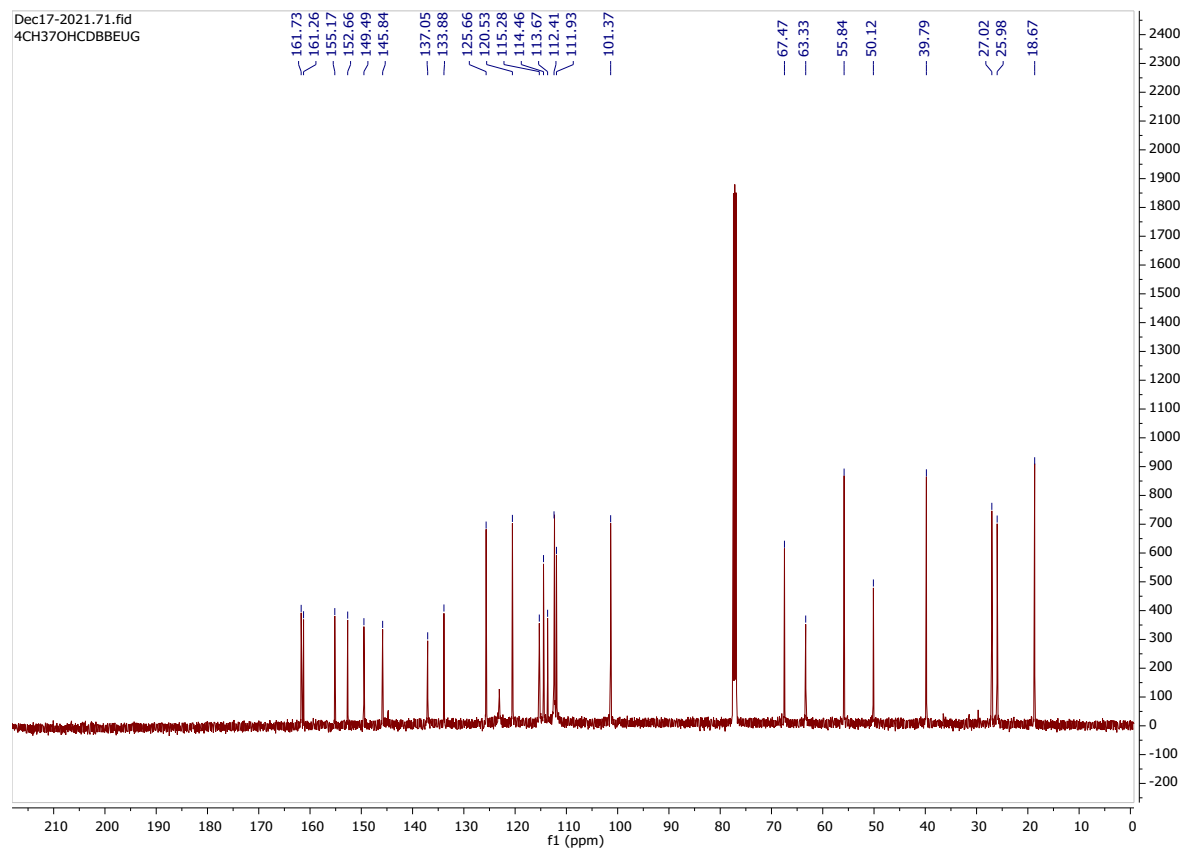

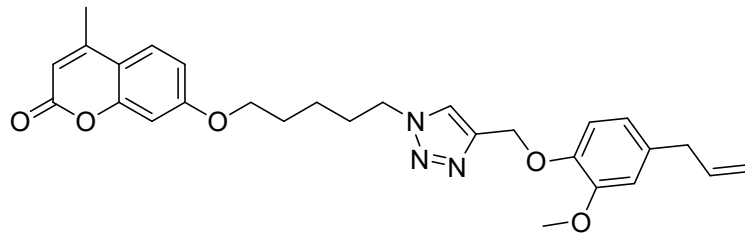

$^1\text{H}$  spectrum of 7-((5-(4-((4-allyl-2-methoxyphenoxy)methyl)-1H-1,2,3-triazol-1-yl)pentyl)oxy)-4-methyl-2H-chromen-2-one (**A14**)

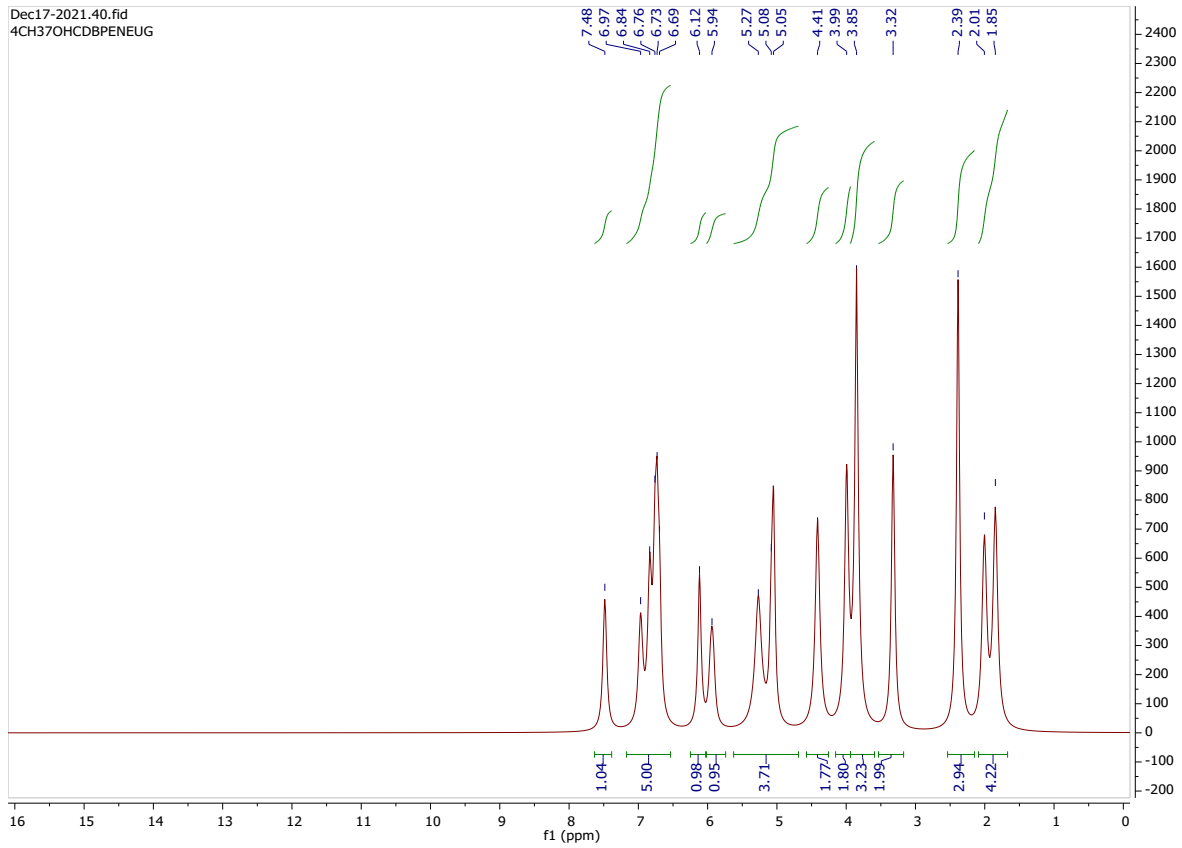

<sup>13</sup>C spectrum of 7-((5-(4-((4-allyl-2-methoxyphenoxy)methyl)-1H-1,2,3-triazol-1-yl)pentyl)oxy)-4-methyl-2H-chromen-2-one (A14)

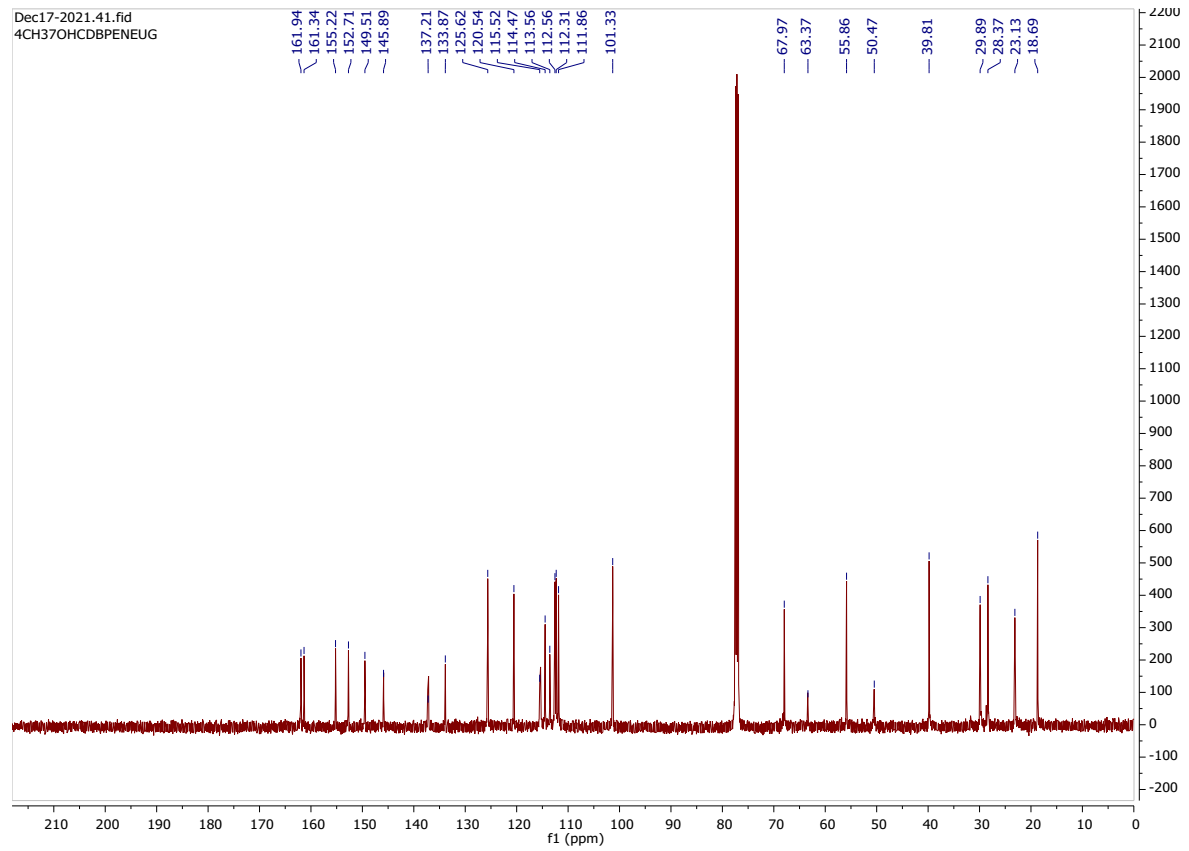

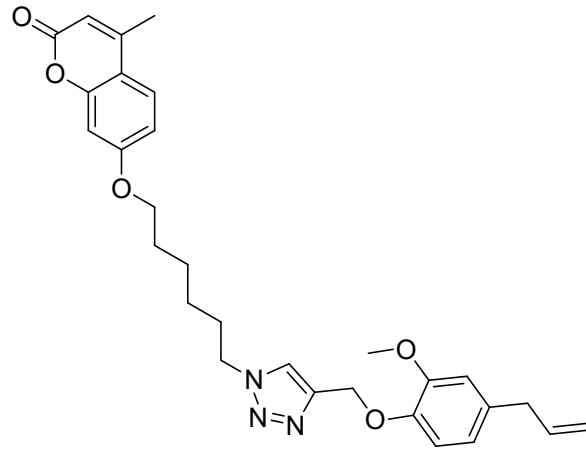

$^1\text{H}$  spectrum of 7-((6-(4-((4-allyl-2-methoxyphenoxy)methyl)-1H-1,2,3-triazol-1-yl)hexyl)oxy)-4-methyl-2H-chromen-2-one (A15)

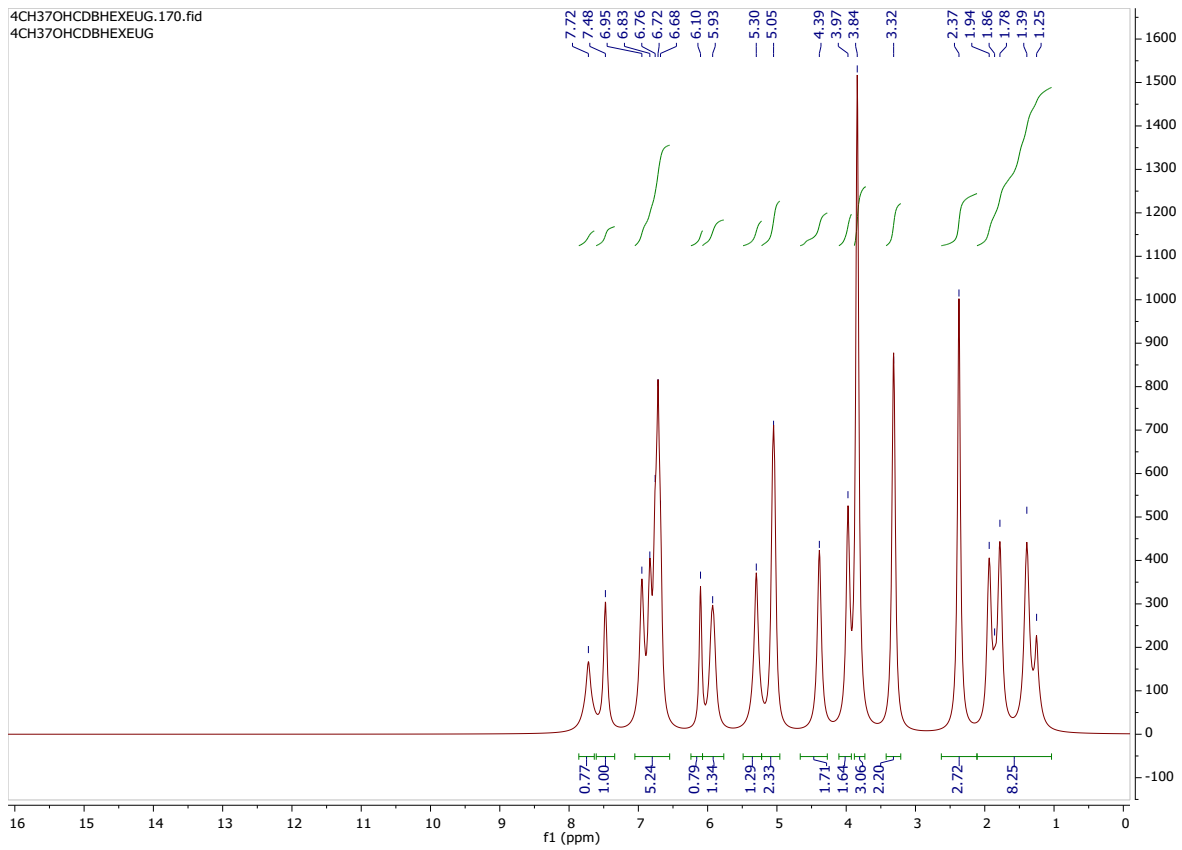

<sup>13</sup>C spectrum of 7-((6-(4-((4-allyl-2-methoxyphenoxy)methyl)-1H-1,2,3-triazol-1-yl)hexyl)oxy)-4-methyl-2H-chromen-2-one (A15)

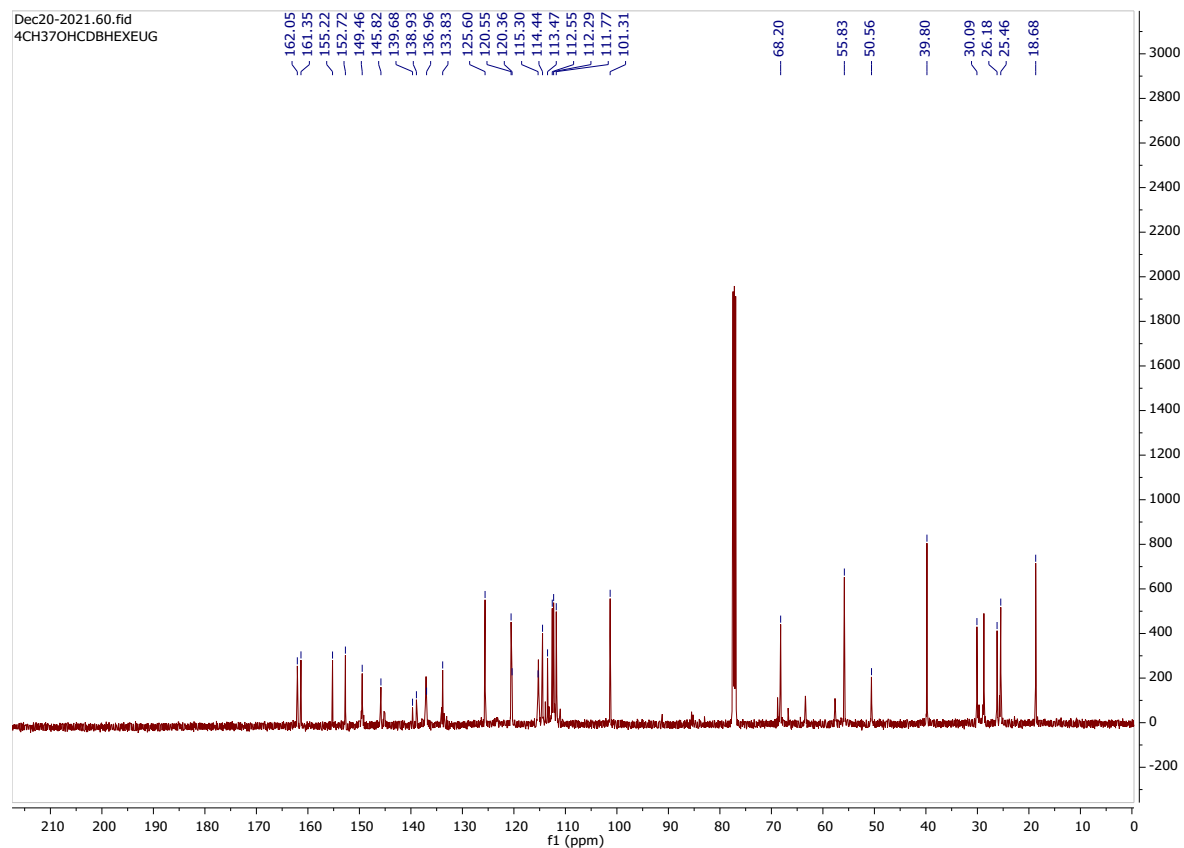

Supplement: d4md00782d2.pdf [file d4md00782d2.pdf]
