# Supplementary material for: Development of coumarin-inspired bifunctional hybrids as a new class of anti-Alzheimer's agents with potent in vivo efficacy
Source: Royal Society of Chemistry journal article supplement (doi:10.1039/d4md00782d), 2024-12-11
Supplement: d4md00782d1.pdf [file d4md00782d1.pdf]

**Development of coumarin-inspired bifunctional hybrids as a new class of anti-Alzheimer's agents with potent *in vivo* efficacy**

Atamjit Singh<sup>1,\*</sup>, Aman Sharma<sup>1</sup>, Karanvir Singh<sup>1</sup>, Kirandeep Kaur<sup>1</sup>, Pallvi Mohana<sup>2</sup>, Jignesh Prajapati<sup>3</sup>, Uttam Kaur<sup>4</sup>, Dweipayan Goswami<sup>3</sup>, Saroj Arora<sup>2</sup>, Renu Chadha<sup>5</sup>, Preet Mohinder Singh Bedi<sup>1,6\*</sup>

<sup>1</sup>*Department of Pharmaceutical Sciences, Guru Nanak Dev University, Amritsar, Punjab 143005, India*

<sup>2</sup>*Department of Botanical and Environmental Sciences, Guru Nanak Dev University, Amritsar, Punjab 143005, India*

<sup>3</sup>*Department of Microbiology & Biotechnology, University School of Sciences, Gujrat University, Ahmedabad, Gujrat 380009, India*

<sup>4</sup>*University School of Business Management, Chandigarh University, Gharuan 140413, India*

<sup>5</sup>*University Institute of Pharmaceutical Sciences, Punjab University, Chandigarh 160014, India*

<sup>6</sup>*Drug and Pollution testing Laboratory, Guru Nanak Dev University, Amritsar, Punjab 143005, India*

\*Corresponding authors:

1. Dr. Atamjit Singh

Department of Pharmaceutical Sciences, Guru Nanak Dev University, Amritsar, Punjab 143005, India

Email id: atampanesar@gmail.com, [atamjitpharma.rsh@gndu.ac.in](mailto:atamjitpharma.rsh@gndu.ac.in)

ORCID: 0000-0001-5439-8032

2. Prof. Preet Mohinder Singh Bedi

Department of Pharmaceutical Sciences, Guru Nanak Dev University, Amritsar, Punjab 143005, India

Email id: bedi\_preet@yahoo.com, [preet.pharma@gndu.ac.in](mailto:preet.pharma@gndu.ac.in)

**Table 1.** Protein-ligand interactions, dock scores, and binding energy ( $\Delta G$ ) of hybrid molecules.

| Compound | Ligand Interactions                                                                 | Dock score | Binding energy ( $\Delta G$ )<br>Kj/mol |
|----------|-------------------------------------------------------------------------------------|------------|-----------------------------------------|
| AS1      | 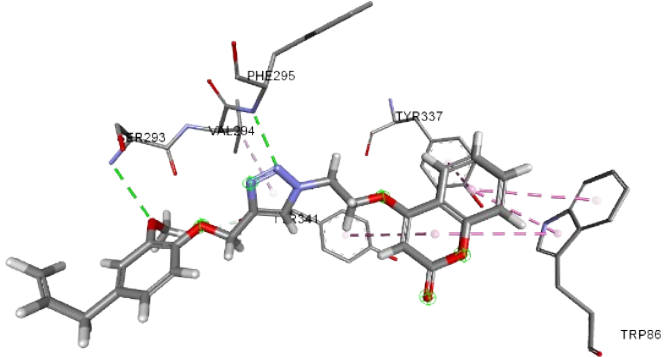  | -25.8367   | -12                                     |
| AS2      |  | -29.8742   | -2                                      |

|                   |                                                                                    |                 |           |
|-------------------|------------------------------------------------------------------------------------|-----------------|-----------|
| <p><b>AS3</b></p> | 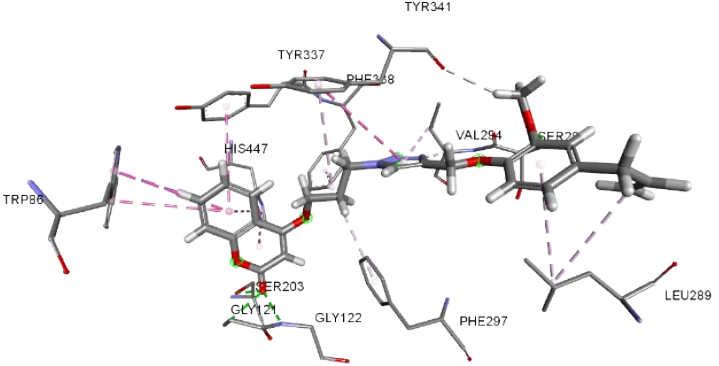 | <p>-22.9106</p> | <p>4</p>  |
| <p><b>AS4</b></p> |  | <p>-25.3112</p> | <p>-4</p> |

|                   |                                                                                                                                                                                           |                 |            |
|-------------------|-------------------------------------------------------------------------------------------------------------------------------------------------------------------------------------------|-----------------|------------|
| <p><b>AS5</b></p> | 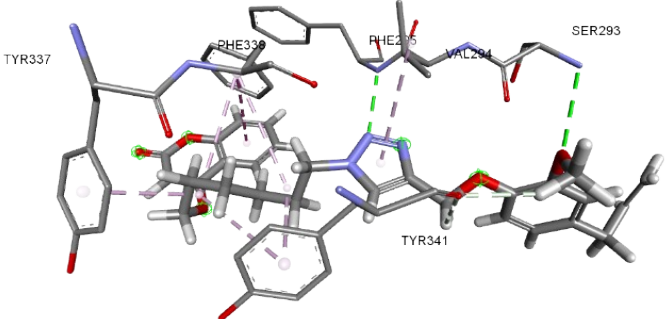 <p>TYR337, PHE339, PHE295, VAL294, SER293, TYR341</p>                                                  | <p>-23.0363</p> | <p>-33</p> |
| <p><b>AS6</b></p> |  <p>ALA204, SER203, LYS121, GLY122, TRP286, LEU289, TYR341, PHE295, VAL294, SER293</p>                  | <p>-31.3264</p> | <p>-7</p>  |
| <p><b>AS7</b></p> |  <p>TYR124, TRP286, LYS121, GLY122, SER203, HIS447, TYR337, PHE338, PHE295, TYR341, VAL294, SER293</p> | <p>-25.3042</p> | <p>-13</p> |

|                    |                                                                                     |                 |            |
|--------------------|-------------------------------------------------------------------------------------|-----------------|------------|
| <p><b>AS8</b></p>  | 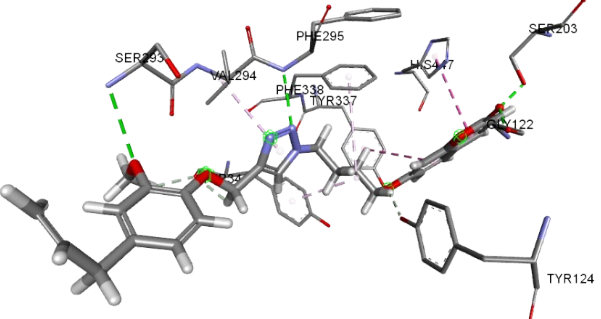  | <p>-28.8645</p> | <p>-13</p> |
| <p><b>AS9</b></p>  |   | <p>-20.9002</p> | <p>-22</p> |
| <p><b>AS10</b></p> |  | <p>-21.3697</p> | <p>-8</p>  |

|             |                                                                                     |          |     |
|-------------|-------------------------------------------------------------------------------------|----------|-----|
| <b>AS11</b> | 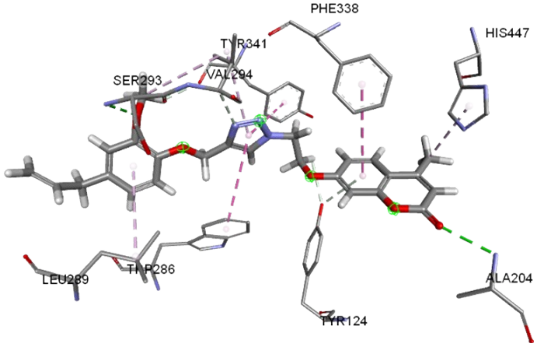  | -26.3132 | -7  |
| <b>AS12</b> |   | -22.0890 | -12 |
| <b>AS13</b> |  | -25.4282 | 4   |

|                         |                                                                                     |                 |            |
|-------------------------|-------------------------------------------------------------------------------------|-----------------|------------|
| <p><b>AS14</b></p>      | 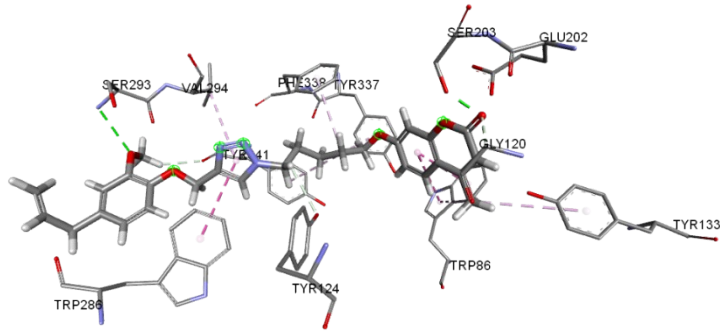  | <p>-21.3793</p> | <p>-22</p> |
| <p><b>AS15</b></p>      |   | <p>-21.6765</p> | <p>-57</p> |
| <p><b>Donepezil</b></p> |  | <p>-28.7716</p> | <p>-43</p> |

**Table 2.** Lipinski parameters of hybrid molecules.

| <b>Compound</b> | <b>mi log <i>P</i></b> | <b>TPSA ((Å<sup>2</sup>))</b> | <b>MW (g/mol)</b> | <b>nON</b> | <b>nOHNH</b> |
|-----------------|------------------------|-------------------------------|-------------------|------------|--------------|
| AS1             | 3.84                   | 88.63                         | 433.46            | 8          | 0            |
| AS2             | 4.11                   | 88.63                         | 447.49            | 8          | 0            |
| AS3             | 4.38                   | 88.63                         | 461.52            | 8          | 0            |
| AS4             | 4.89                   | 88.63                         | 475.55            | 8          | 0            |
| AS5             | 5.39                   | 88.63                         | 489.57            | 8          | 0            |
| AS6             | 3.89                   | 88.63                         | 433.46            | 8          | 0            |
| AS7             | 4.16                   | 88.63                         | 447.49            | 8          | 0            |
| AS8             | 4.43                   | 88.63                         | 461.52            | 8          | 0            |
| AS9             | 4.94                   | 88.63                         | 475.55            | 8          | 0            |
| AS10            | 5.44                   | 88.63                         | 489.57            | 8          | 0            |
| AS11            | 4.27                   | 88.63                         | 447.49            | 8          | 0            |
| AS12            | 4.54                   | 88.63                         | 461.52            | 8          | 0            |
| AS13            | 4.81                   | 88.63                         | 475.55            | 8          | 0            |
| AS14            | 5.31                   | 88.63                         | 489.57            | 8          | 0            |
| AS15            | 5.82                   | 88.63                         | 503.60            | 8          | 0            |



**Table 3.** ADME properties of hybrid molecules.

| <b>Compound</b> | <b>BBB</b> | <b>CYP2D6<br/>substrate</b> | <b>CYP3A4<br/>substrate</b> | <b>HIA</b> | <b>MDCK</b> | <b>PPB</b> |
|-----------------|------------|-----------------------------|-----------------------------|------------|-------------|------------|
| <b>AS1</b>      | 0.2779     | Non                         | Substrate                   | 98.84      | 25.7343     | 90.50      |
| <b>AS2</b>      | 0.7409     | Non                         | Substrate                   | 98.67      | 0.2277      | 92.72      |
| <b>AS3</b>      | 0.6422     | Non                         | Substrate                   | 98.50      | 0.7565      | 90.95      |
| <b>AS4</b>      | 0.0917     | Non                         | Substrate                   | 98.33      | 0.3145      | 91.02      |
| <b>AS5</b>      | 0.0171     | Non                         | Substrate                   | 98.17      | 18.8922     | 91.31      |
| <b>AS6</b>      | 0.8983     | Non                         | Substrate                   | 98.84      | 6.3194      | 91.63      |
| <b>AS7</b>      | 0.1875     | Non                         | Substrate                   | 98.67      | 1.8036      | 93.53      |
| <b>AS8</b>      | 0.0224     | Non                         | Substrate                   | 98.50      | 2.7041      | 91.52      |
| <b>AS9</b>      | 0.2168     | Non                         | Substrate                   | 98.33      | 5.2719      | 91.40      |
| <b>AS10</b>     | 0.0369     | Non                         | Substrate                   | 98.17      | 36.2571     | 91.52      |
| <b>AS11</b>     | 1.0996     | Non                         | Substrate                   | 98.67      | 9.7944      | 91.33      |
| <b>AS12</b>     | 0.0406     | Non                         | Substrate                   | 98.50      | 0.6764      | 93.09      |
| <b>AS13</b>     | 0.0237     | Non                         | Substrate                   | 98.33      | 11.1126     | 91.32      |
| <b>AS14</b>     | 0.1722     | Non                         | Substrate                   | 98.17      | 8.3560      | 91.23      |
| <b>AS15</b>     | 0.0453     | Non                         | Substrate                   | 98.02      | 41.4197     | 91.32      |
