# Supplementary figures and images for: Development of coumarin-inspired bifunctional hybrids as a new class of anti-Alzheimer's agents with potent in vivo efficacy
Source: Royal Society of Chemistry journal article supplement (doi:10.1039/d4md00782d), 2024-12-11

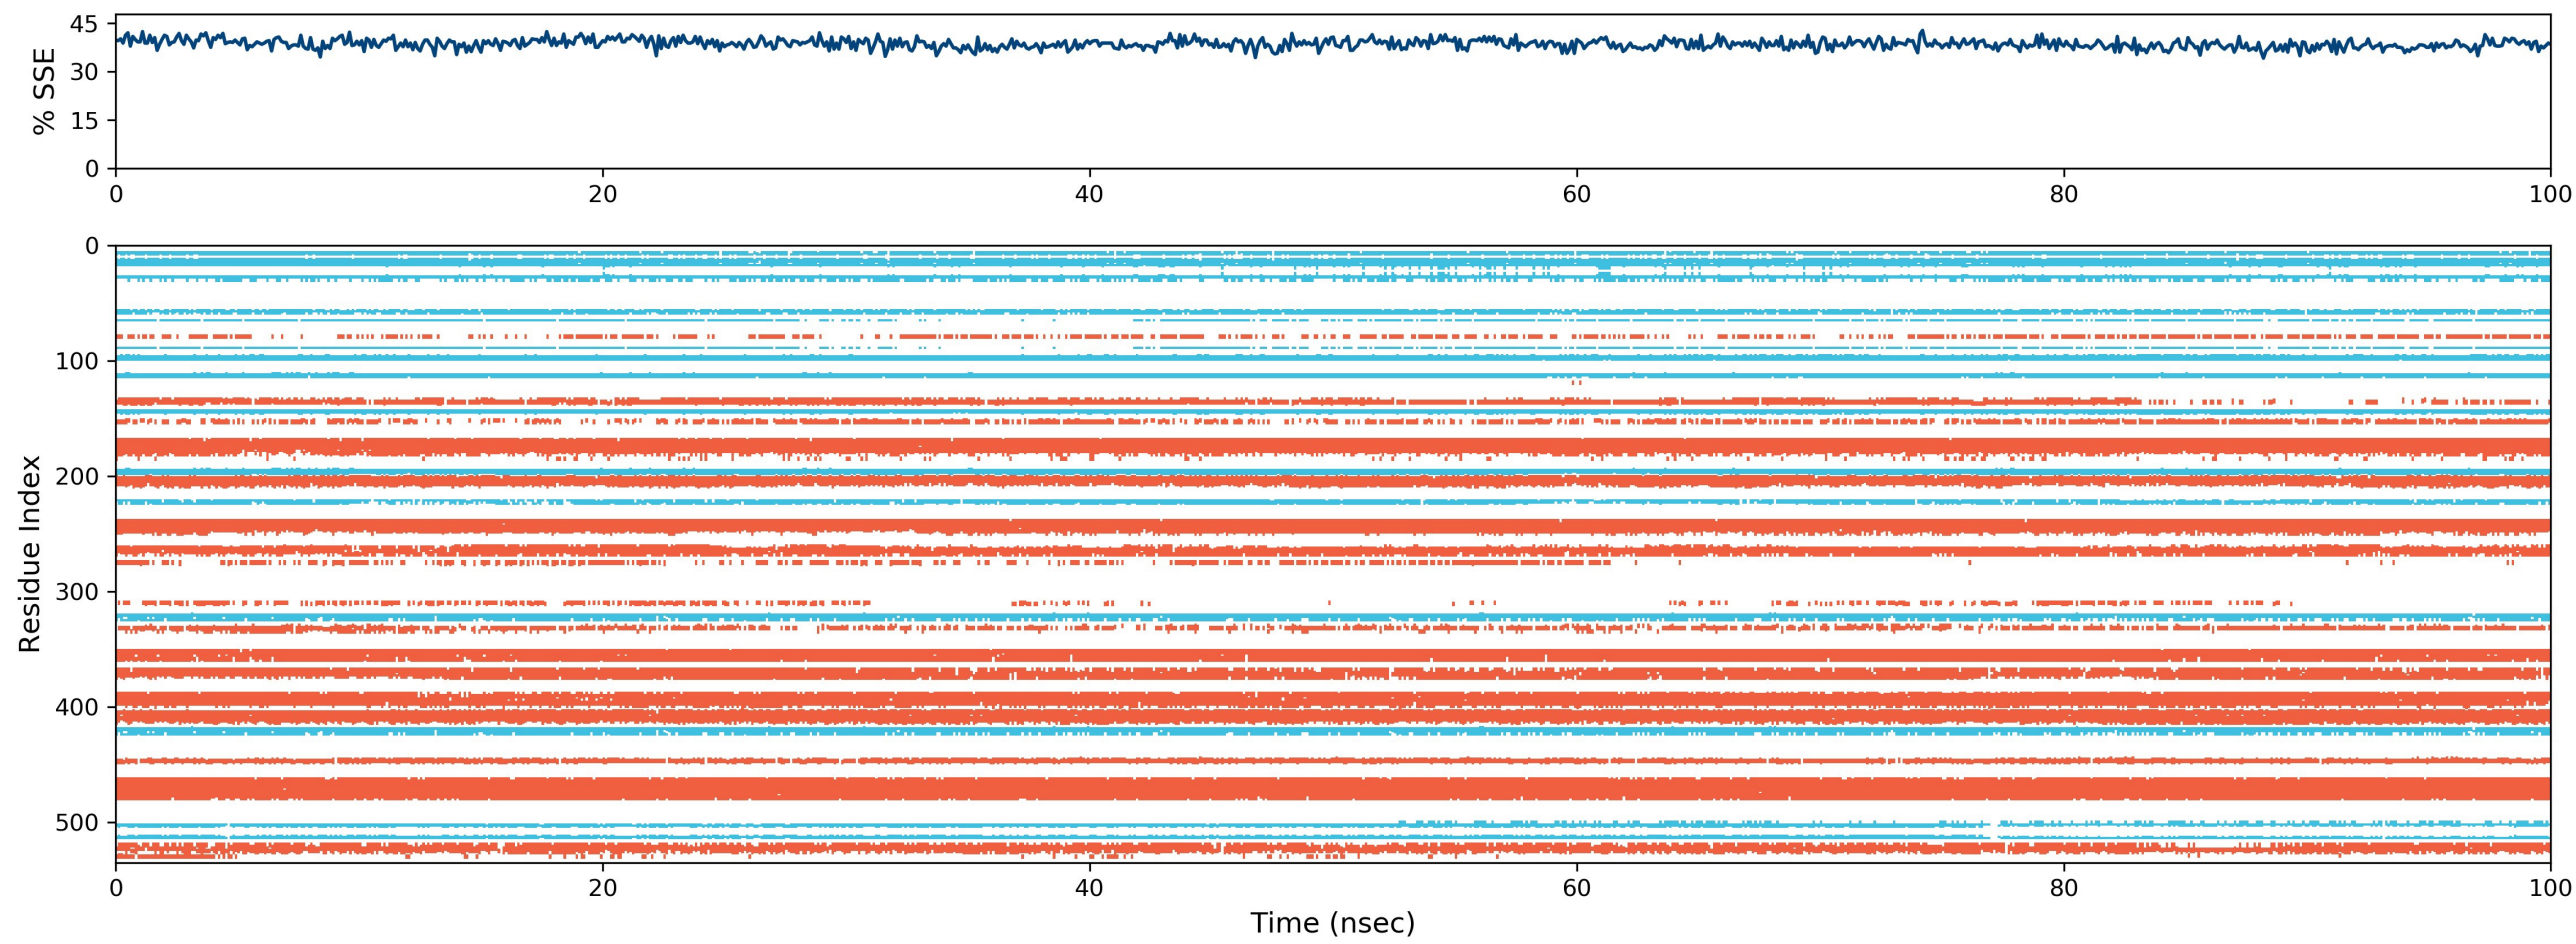

Supplement: d4md00782d4.pdf [file d4md00782d4.pdf]
